# Brain Aging in Major Depressive Disorder: Results from the ENIGMA Major Depressive Disorder working group

Running title: Brain Aging in MDD: results from ENIGMA

Laura K M Han, MSc,<sup>1,\*</sup> Richard Dinga, MSc,<sup>1</sup> Tim Hahn, PhD,<sup>2</sup> Christopher R K Ching, BA,<sup>3,4</sup> Lisa T Eyler, PhD,<sup>5,6</sup> Lyubomir Aftanas, PhD,<sup>7,8</sup> Moji Aghajani, PhD,<sup>1</sup> André Aleman, PhD,<sup>9,10</sup> Bernhard T Baune, PhD,<sup>2,11,12</sup> Klaus Berger, MD,<sup>13</sup> Ivan Brak, PhD,<sup>7,14</sup> Geraldo Busatto Filho, PhD,<sup>15</sup> Angela Carballedo, MD,<sup>16,17</sup> Colm G Connolly, PhD,<sup>18</sup> Baptiste Couvy-Duchesne, PhD,<sup>19</sup> Kathryn Cullen, MD,<sup>20</sup> Udo Dannlowski, PhD,<sup>2</sup> Christopher G Davey, PhD,<sup>21,22</sup> Danai Dima, PhD,<sup>23,24</sup> Fabio L S Duran, PhD,<sup>15</sup> Verena Enneking, MSc,<sup>2</sup> Elena Filimonova, MD,<sup>7</sup> Stefan Frenzel, MSc,<sup>25</sup> Thomas Frodl, PhD,<sup>16,26,27</sup> Cynthia H Y Fu, PhD,<sup>28,29</sup> Beata R Godlewska, MD,<sup>30</sup> Ian H Gotlib, PhD,<sup>31</sup> Hans J Grabe, MD,<sup>25,32</sup> Nynke A Groenewold, PhD,<sup>33,34</sup> Dominik Grotegerd, PhD,<sup>2</sup> Oliver Gruber, MD,<sup>35</sup> Geoffrey B Hall, PhD,<sup>36</sup> Ben J Harrison, PhD,<sup>37</sup> Sean N Hatton, PhD,<sup>38,39</sup> Marco Hermesdorf, PhD,<sup>13</sup> Ian B Hickie, MD,<sup>38</sup> Tiffany C Ho, PhD,<sup>31,40</sup> Norbert Hosten, MD,<sup>41</sup> Andreas Jansen, PhD,<sup>42</sup> Claas Kähler, MSc,<sup>2</sup> Tilo Kircher, MD,<sup>42</sup> Bonnie Klimes-Dougan, PhD,<sup>43</sup> Bernd Krämer, PhD,<sup>35</sup> Axel Krug, PhD,<sup>42</sup> Jim Lagopoulos, PhD,<sup>38,44</sup> Ramona Leenings, MSc,<sup>2</sup> Frank P MacMaster, PhD,<sup>45,46</sup> Glenda MacQueen, PhD,<sup>47</sup> Andrew McIntosh, MD,<sup>48</sup> Quinn McLellan, MSc,<sup>45</sup> Katie L McMahon, PhD,<sup>49,50</sup> Sarah E Medland, PhD,<sup>51</sup> Bryon A Mueller, PhD,<sup>20</sup> Benson Mwangi, PhD,<sup>52</sup> Evgeny Osipov, MSc,<sup>14</sup> Maria J Portella, PhD,<sup>53,54</sup> Elena Pozzi, MSc,<sup>21,37</sup> Liesbeth Reneman, PhD,<sup>55</sup> Jonathan Repple, MD,<sup>2</sup> Pedro G P Rosa, MD,<sup>15</sup> Matthew D Sacchet, PhD,<sup>56</sup> Philipp G Sämann, MD,<sup>57</sup> Knut Schnell, PhD,<sup>58,59</sup> Anouk Schranz, PhD,<sup>55</sup> Egle Simulionyte, MD,<sup>35</sup> Jair C Soares, PhD,<sup>52</sup> Jens Sommer, PhD,<sup>42</sup> Dan J Stein, PhD,<sup>34,60</sup> Olaf Steinträter, PhD,<sup>42</sup> Lachlan T Strike, PhD,<sup>61</sup> Sophia I Thomopoulos, BA,<sup>3</sup> Marie-José van Tol, PhD,<sup>62</sup> Ilya M Veer, PhD,<sup>63</sup> Robert R J M Vermeiren, PhD,<sup>64,65</sup> Henrik Walter, PhD,<sup>63</sup> Nic J A van der Wee, PhD,<sup>65,66</sup> Steven J A van der Werff, PhD,<sup>65,66</sup> Heather Whalley, PhD,<sup>48</sup> Nils R Winter, MSc,<sup>2</sup> Katharina Wittfeld, PhD,<sup>25,32</sup> Margaret J Wright, PhD,<sup>61,67</sup> Mon-Ju Wu, PhD,<sup>52</sup> Henry Völzke, MD,<sup>68</sup> Tony T Yang, MD,<sup>69</sup> Vasileios Zannias, MSc,<sup>48</sup> Greig I de Zubicaray, PhD,<sup>50,70</sup> Giovana B Zunta-Soares, MD,<sup>52</sup> Christoph Abé, PhD,<sup>71</sup> Martin Alda, MD,<sup>72</sup> Ole A Andreassen, PhD,<sup>73,74</sup> Erlend Bøen, PhD,<sup>75</sup> Caterina M Bonnin, PhD,<sup>76</sup> Erick J Canales-Rodriguez, PhD,<sup>77</sup> Dara Cannon, PhD,<sup>78</sup> Xavier Caseras, PhD,<sup>79</sup> Tiffany M Chaim-Avancini, MD,<sup>15</sup> Torbjørn Elvsåshagen, PhD,<sup>80,81</sup> Pauline Favre, PhD,<sup>82</sup> Sonya F Foley, PhD,<sup>83</sup> Janice M Fullerton, PhD,<sup>84,85</sup> Jose M Goikolea, PhD,<sup>76</sup> Bartholomeus C M Haarman, PhD,<sup>86</sup> Tomas Hajek, PhD,<sup>72</sup> Chantal Henry, PhD,<sup>87</sup> Josselin Houenou, PhD,<sup>82,88</sup> Fleur M Howells, PhD,<sup>34,89</sup> Martin Ingvar, PhD,<sup>71</sup> Rayus Kuplicki, PhD,<sup>90</sup> Beny Lafer, PhD,<sup>91</sup> Mikael Landén, PhD,<sup>92,93</sup> Rodrigo Machado-Vieira, PhD,<sup>91</sup> Ulrik F Malt, MD,<sup>94,95</sup> Colm McDonald, PhD,<sup>78</sup> Philip B Mitchell, MD,<sup>96,97</sup> Leila Nabulsi, MPharm,<sup>78</sup> Maria Concepcion Garcia Otaduy, PhD,<sup>98</sup> Bronwyn J Overs, BPsych,<sup>76</sup> Mircea Polosan, PhD,<sup>99,100</sup> Edith Pomarol-Clotet, PhD,<sup>77</sup> Joaquim Radua, PhD,<sup>76</sup> Maria M Rive, MD,<sup>101</sup> Gloria Roberts, PhD,<sup>96,97</sup> Henricus G Ruhe, MD,<sup>101,102,103</sup> Raymond Salvador, PhD,<sup>77</sup> Salvador Sarró, PhD,<sup>77</sup> Theodore D Satterthwaite, MD,<sup>104</sup> Jonathan Savitz, PhD,<sup>90,105</sup> Aart H Schene, PhD,<sup>102,103</sup> Peter R Schofield, PhD,<sup>84,85</sup> Mauricio H Serpa, MD,<sup>15</sup> Kang Sim, MD,<sup>106,107</sup> Marcio Gerhardt Soeiro-de-Souza, PhD,<sup>91</sup> Ashley N Sutherland, MS,<sup>6</sup> Henk S Temmingh, MD,<sup>34,108</sup> Garrett M Timmons,<sup>6</sup> Anne Uhlmann, PhD,<sup>34</sup> Eduard Vieta, PhD,<sup>76</sup> Daniel H Wolf, PhD,<sup>104</sup> Marcus V Zanetti, MD,<sup>15,109</sup> Neda Jahanshad, PhD,<sup>3</sup> Paul M Thompson, PhD,<sup>3</sup> Dick J Veltman, PhD,<sup>1</sup> Brenda W J H Penninx, PhD,<sup>1,§</sup> Andre F Marquand, PhD,<sup>103,110,§</sup> James H Cole, PhD,<sup>24,§</sup> Lianne Schmaal, PhD<sup>21,22,§</sup>

§These authors jointly supervised this work.

- 55  
56  
57  
58 <sup>1</sup> Department of Psychiatry, Amsterdam University Medical Centers, VU University Medical Center, GGZ  
59 inGeest, Amsterdam Neuroscience, Amsterdam, The Netherlands.  
60 <sup>2</sup> Department of Psychiatry, University of Münster, Münster, Germany.  
61 <sup>3</sup> Imaging Genetics Center, Mark & Mary Stevens Neuroimaging & Informatics Institute, Keck School of  
62 Medicine, University of Southern California, Los Angeles, CA, USA.  
63 <sup>4</sup> Graduate Interdepartmental Program in Neuroscience, UCLA School of Medicine.  
64 <sup>5</sup> Desert-Pacific Mental Illness Research Education and Clinical Center, VA San Diego Healthcare.  
65 <sup>6</sup> Department of Psychiatry, University of California San Diego.  
66 <sup>7</sup> FSSBI “Scientific Research Institute of Physiology & Basic Medicine”, Lab. of Affective, Cognitive &  
67 Translational Neuroscience, Novosibirsk, Russia.  
68 <sup>8</sup> Novosibirsk State University, Department of Neuroscience.  
69 <sup>9</sup> University of Groningen, University Medical Center Groningen, Department of Neuroscience, Groningen,  
70 The Netherlands.  
71 <sup>10</sup> University of Groningen, Department of Clinical and Developmental Neuropsychology, Groningen, The  
72 Netherlands.  
73 <sup>11</sup> Department of Psychiatry, Melbourne Medical School, The University of Melbourne, Melbourne, VIC,  
74 Australia.  
75 <sup>12</sup> The Florey Institute of Neuroscience and Mental Health, The University of Melbourne, Melbourne, VIC,  
76 Australia.  
77 <sup>13</sup> Institute of Epidemiology and Social Medicine, University of Münster, Münster, Germany.  
78 <sup>14</sup> Novosibirsk State University, Lab. of Experimental & Translational Neuroscience.  
79 <sup>15</sup> Laboratory of Psychiatric Neuroimaging (LIM-21), Instituto de Psiquiatria, Hospital das Clinicas  
80 HCFMUSP, Faculdade de Medicina, Universidade de Sao Paulo, Sao Paulo, SP, BR.  
81 <sup>16</sup> Department for Psychiatry, Trinity College Dublin, Dublin, Ireland.  
82 <sup>17</sup> North Dublin Mental Health Services, Dublin, Ireland.  
83 <sup>18</sup> Department of Biomedical Sciences, Florida State University, Tallahassee FL.  
84 <sup>19</sup> Institute for Molecular Bioscience, University of Queensland, Brisbane, Australia.  
85 <sup>20</sup> Department of Psychiatry, University of Minnesota, Minneapolis, MN, USA.  
86 <sup>21</sup> Orygen, The National Centre of Excellence in Youth Mental Health, Parkville, Australia.  
87 <sup>22</sup> Centre for Youth Mental Health, The University of Melbourne.  
88 <sup>23</sup> Department of Psychology, School of Arts and Social Sciences, City University London, London, UK.  
89 <sup>24</sup> Department of Neuroimaging, Institute of Psychiatry, Psychology & Neuroscience, King’s College  
90 London, UK.  
91 <sup>25</sup> Department of Psychiatry and Psychotherapy, University Medicine Greifswald, Germany.  
92 <sup>26</sup> Department of Psychiatry and Psychotherapy, Otto von Guericke University (OVGU), Magdeburg,  
93 Germany.  
94 <sup>27</sup> German Center for Neurodegenerative Diseases (DZNE), Germany.  
95 <sup>28</sup> Centre for Affective Disorders, Institute of Psychiatry, Psychology & Neuroscience, King’s College  
96 London, UK.  
97 <sup>29</sup> School of Psychology, University of East London, UK.  
98 <sup>30</sup> Department of Psychiatry, University of Oxford.  
99 <sup>31</sup> Department of Psychology, Stanford University, Stanford, CA, USA.  
100 <sup>32</sup> German Center of Neurodegenerative Diseases (DZNE) Site Rostock/Greifswald, Germany.  
101 <sup>33</sup> University of Groningen, University Medical Center Groningen, Interdisciplinary Center  
102 Psychopathology and Emotion regulation (ICPE), Groningen, The Netherlands.  
103 <sup>34</sup> Department of Psychiatry and Mental Health, University of Cape Town, South Africa.  
104 <sup>35</sup> Section for Experimental Psychopathology and Neuroimaging, Department of Psychiatry, University of  
105 Heidelberg, Heidelberg, Germany.  
106 <sup>36</sup> Department of Psychology, Neuroscience & Behaviour, McMaster University, Hamilton, Canada.  
107 <sup>37</sup> Melbourne Neuropsychiatry Centre, Department of Psychiatry, The University of Melbourne &  
108 Melbourne Health, Melbourne, Australia.  
109 <sup>38</sup> Youth Mental Health Team, Brain and Mind Centre, University of Sydney, Australia.  
110 <sup>39</sup> Department of Neuroscience, University of California San Diego, CA, USA.

- 111 <sup>40</sup> Department of Psychiatry & Behavioral Sciences, Standord University, Stanford, CA, USA.  
112 <sup>41</sup> Department of Diagnostic Radiology and Neuroradiology, University Medicine Greifswald, Germany.  
113 <sup>42</sup> Department of Psychiatry, Philipps-University Marburg, Germany.  
114 <sup>43</sup> Department of Psychology, University of Minnesota, Minneapolis, MN, USA.  
115 <sup>44</sup> Sunshine Coast Mind and Neuroscience Institute, University of the Sunshine Coast QLD, Australia.  
116 <sup>45</sup> Departments of Psychiatry and Pediatrics, University of Calgary, Calgary, AB, Canada.  
117 <sup>46</sup> Addictions and Mental Health Strategic Clinical Network.  
118 <sup>47</sup> Department of Psychiatry, University of Calgary, Calgary, AB, Canada.  
119 <sup>48</sup> Division of Psychiatry, University of Edinburgh, UK.  
120 <sup>49</sup> School of Clinical Sciences, Queensland University of Technology, Brisbane, Australia.  
121 <sup>50</sup> Institute of Health and Biomedical Innovation, Queensland University of Technology, Brisbane,  
122 Australia.  
123 <sup>51</sup> QIMR Berghofer Medical Research Institute, Brisbane, Australia.  
124 <sup>52</sup> Department of Psychiatry and Behavioral Sciences, The University of Texas Health Science Center at  
125 Houston.  
126 <sup>53</sup> Institut d'Investigació Biomèdica Sant Pau, Barcelona, Catalonia.  
127 <sup>54</sup> Centro de Investigación Biomédica en Red de Salud Mental, CIBERSAM, Spain.  
128 <sup>55</sup> Department of Radiology and Nuclear Medicine, Amsterdam University Medical Centers, AMC,  
129 Amsterdam, The Netherlands.  
130 <sup>56</sup> Center for Depression, Anxiety, and Stress Research, McLean Hospital, Harvard Medical School,  
131 Belmont, MA, USA.  
132 <sup>57</sup> Max Planck Institute of Psychiatry.  
133 <sup>58</sup> Department of Psychiatry and Psychotherapy, University Medical Center Göttingen, Göttingen,  
134 Germany.  
135 <sup>59</sup> Department of Psychiatry and Psychotherapy, Asklepios Fachklinikum Göttingen, Göttingen, Germany.  
136 <sup>60</sup> MRC Unit on Risk and Resilience, University of Cape Town, Cape Town, South Africa.  
137 <sup>61</sup> Queensland Brain Institute, University of Queensland, Brisbane, Australia.  
138 <sup>62</sup> Cognitive Neuroscience Center, University Medical Center Groningen, University of Groningen,  
139 Groningen, the Netherlands.  
140 <sup>63</sup> Division of Mind and Brain Research, Department of Psychiatry and Psychotherapy CCM, Charité -  
141 Universitätsmedizin Berlin, corporate member of Freie Universität Berlin, Humboldt-Universität zu  
142 Berlin, and Berlin Institute of Health, Berlin, Germany.  
143 <sup>64</sup> Department of Child Psychiatry, University Medical Center, Leiden, the Netherlands.  
144 <sup>65</sup> Leiden Institute for Brain and Cognition, Leiden University, Leiden, the Netherlands.  
145 <sup>66</sup> Department of Psychiatry, University Medical Center Leiden, Leiden, the Netherlands.  
146 <sup>67</sup> Centre for Advanced Imaging, University of Queensland, Brisbane, Australia.  
147 <sup>68</sup> Institute for Community Medicine, University Medicine Greifswald, Germany.  
148 <sup>69</sup> Department of Psychiatry, Division of Child and Adolescent Psychiatry, UCSF School of Medicine,  
149 UCSF, San Francisco, CA, USA.  
150 <sup>70</sup> Faculty of Health, Queensland University of Technology, Brisbane, Australia.  
151 <sup>71</sup> Department of Clinical Neuroscience, Osher Center, Karolinska Institutet, Stockholm, Sweden.  
152 <sup>72</sup> Department of Psychiatry, Dalhousie University, Halifax, Nova Scotia, Canada.  
153 <sup>73</sup> NORMENT Centre, Inst. of Clinical Medicine, University of Oslo, Oslo, Norway.  
154 <sup>74</sup> Division of Mental Health and Addiction, Oslo University Hospital, Oslo, Norway.  
155 <sup>75</sup> Clinic for Mental Health and Dependency, C-L psychiatry and psychosomatic unit, Oslo University  
156 Hospital, Oslo, Norway.  
157 <sup>76</sup> Hospital Clinic, University of Barcelona, IDIBAPS, CIBERSAM, Barcelona, Catalonia, Spain.  
158 <sup>77</sup> FIDMAG Germanes Hospitalàries Research Foundation, CIBERSAM, Barcelona, Catalonia, Spain.  
159 <sup>78</sup> Centre for Neuroimaging & Cognitive Genomics (NICOG), Clinical Neuroimaging Laboratory, NCBES  
160 Galway Neuroscience Centre, College of Medicine Nursing and Health Sciences, National  
161 University of Ireland Galway, H91 TK33 Galway, Ireland.  
162 <sup>79</sup> MRC Centre for Neuropsychiatric Genetics and Genomics, Cardiff University, UK.  
163 <sup>80</sup> Norwegian Centre for Mental Disorders Research, Inst. of Clinical Medicine, University of Oslo, Oslo,  
164 Norway.  
165 <sup>81</sup> Department of Neurology, Oslo University Hospital, Oslo, Norway.  
166 <sup>82</sup> UNIACT, Psychiatry Team, Neurospin, Atomic Energy Commission, Gif-Sur-Yvette, France.

- 167 <sup>83</sup> Cardiff University Brain Research Imaging Centre, Cardiff University, UK.  
168 <sup>84</sup> Neuroscience Research Australia, Randwick, Sydney, Australia.  
169 <sup>85</sup> School of Medical Sciences, University of New South Wales, Kingsford, Sydney, Australia.  
170 <sup>86</sup> University of Groningen, University Medical Center Groningen, Department of Psychiatry, Groningen,  
171 The Netherlands.  
172 <sup>87</sup> Unité Perception et Mémoire, Centre National de la Recherche Scientifique, Institut Pasteur, Paris,  
173 France.  
174 <sup>88</sup> APHP, Hôpitaux Universitaires Mondor, INSERM, U955, Translational Psychiatry Team, Pôle de  
175 psychiatrie, Faculté de médecine, Créteil, France.  
176 <sup>89</sup> Neuroscience Institute, University of Cape Town, Cape Town, South Africa.  
177 <sup>90</sup> Laureate Institute for Brain Research.  
178 <sup>91</sup> Instituto de Psiquiatria, Hospital das Clinicas HCFMUSP, Faculdade de Medicina, Universidade de Sao  
179 Paulo, Sao Paulo, SP, BR.  
180 <sup>92</sup> Department of Psychiatry and Neurochemistry, Institute of Neuroscience and Physiology, the  
181 Sahlgrenska Academy at the University of Gothenburg, Gothenburg, Sweden.  
182 <sup>93</sup> Department of Medical Epidemiology and Biostatistics, Karolinska Institutet, Stockholm, Sweden.  
183 <sup>94</sup> Department of Clinical Neuroscience, University of Oslo, Norway.  
184 <sup>95</sup> Clinic for Psychiatry and Dependency, C-L psychiatry and psychosomatic unit, Oslo University Hospital,  
185 Oslo, Norway.  
186 <sup>96</sup> School of Psychiatry, University of New South Wales, Kingsford, Sydney, Australia.  
187 <sup>97</sup> Black Dog Institute, Prince of Wales Hospital, Randwick, Sydney, Australia.  
188 <sup>98</sup> Instituto de Radiologia, Hospital das Clinicas HCFMUSP, Faculdade de Medicina, Universidade de Sao  
189 Paulo, Sao Paulo, SP, BR.  
190 <sup>99</sup> Department of Psychiatry and Neurology, CHU Grenoble Alpes, Univ. Grenoble Alpes, F-38000  
191 Grenoble, France.  
192 <sup>100</sup> Inserm 1216, Grenoble Institut des Neurosciences, GIN, F-38000 Grenoble.  
193 <sup>101</sup> Department of Psychiatry, Amsterdam University Medical Centers, AMC, Amsterdam, The  
194 Netherlands.  
195 <sup>102</sup> Department of Psychiatry, Radboud University Medical Center, Nijmegen, The Netherlands.  
196 <sup>103</sup> Donders Institute for Brain, Cognition and Behavior, Radboud University, Nijmegen, The Netherlands.  
197 <sup>104</sup> Department of Psychiatry, University of Pennsylvania Perelman School of Medicine, Philadelphia,  
198 PA, USA.  
199 <sup>105</sup> Oxley College of Health Sciences, The University of Tulsa.  
200 <sup>106</sup> West Region and Research Division, Institute of Mental Health, Singapore.  
201 <sup>107</sup> Yong Loo Lin School of Medicine, National University of Singapore, Singapore.  
202 <sup>108</sup> Valkenberg Psychiatric Hospital, Cape Town, South Africa.  
203 <sup>109</sup> Instituto de Ensino e Pesquisa, Hospital Sírio-Libanês, Sao Paulo, SP, Brazil.  
204 <sup>110</sup> Department of Cognitive Neuroscience, Radboud University Medical Centre, Nijmegen, The  
205 Netherlands.  
206  
207  
208  
209  
210  
211  
212  
213  
214  
215

216 \*Correspondence to:

217 Laura Kim Mae Han, MSc  
218 Amsterdam University Medical Centers, VU University Medical Center  
219 The Netherlands  
220 [l.han@vumc.nl](mailto:l.han@vumc.nl)

221 **Abstract**  
222

223 **Background:** Major depressive disorder (MDD) is associated with an increased risk of brain atrophy,  
224 aging-related diseases, and mortality. We examined potential advanced brain aging in MDD patients, and  
225 whether this process is associated with clinical characteristics in a large multi-center international dataset.

226 **Methods:** We performed a mega-analysis by pooling brain measures derived from T1-weighted MRI  
227 scans from 29 samples worldwide. Normative brain aging was estimated by predicting chronological age  
228 (10-75 years) from 7 subcortical volumes, 34 cortical thickness and 34 surface area, lateral ventricles and  
229 total intracranial volume measures separately in 1,147 male and 1,386 female controls from the ENIGMA  
230 MDD working group. The learned model parameters were applied to 1,089 male controls and 1,167  
231 depressed males, and 1,326 female controls and 2,044 depressed females to obtain independent  
232 unbiased brain-based age predictions. The difference between predicted “brain age” and chronological  
233 age was calculated to indicate brain predicted age difference (brain-PAD).

234 **Findings:** On average, MDD patients showed a higher brain-PAD of +0.90 (SE 0.21) years (Cohen’s  
235  $d=0.12$ , 95% CI 0.06-0.17) compared to controls. Relative to controls, first-episode and currently  
236 depressed patients showed higher brain-PAD (+1.2 [0.3] years), and the largest effect was observed in  
237 those with late-onset depression (+1.7 [0.7] years). In addition, higher brain-PAD was associated with  
238 higher self-reported depressive symptomatology ( $b=0.05$ ,  $p=0.004$ ).

239 **Interpretation:** This highly powered collaborative effort showed subtle patterns of abnormal structural  
240 brain aging in MDD. Substantial within-group variance and overlap between groups were observed.  
241 Longitudinal studies of MDD and somatic health outcomes are needed to further assess the predictive  
242 value of these brain-PAD estimates.

243 **Funding:** This work was supported, in part, by NIH grants U54 EB020403 and R01 MH116147.  
244  
245  
246  
247  
248

## 249 **Research in context**

### 250 **Evidence before this study**

251 Accumulating evidence from studies suggests that, at the group level, MDD patients follow advanced  
252 aging trajectories, as their functional (e.g. walking speed, hand grip strength) and biological state (e.g.  
253 telomeres, epigenetics, mitochondria) reflects what is normally expected at an older age (i.e. biological  
254 age “outpaces” chronological age). While subtle structural brain abnormalities have been identified in  
255 MDD, it remains to be elucidated whether patients also deviate from the normal aging process at the  
256 brain level (brain predicted age difference [brain-PAD]) and whether this deviation is associated with  
257 clinical characteristics. We searched PubMed for relevant literature published in English [Language]  
258 before January 25, 2019. In this search we used ((‘brain age’ OR ‘brainAGE’ OR ‘brain-PAD’ OR  
259 ‘predicted brain ag\*’) AND ‘depression’ [Title/Abstract]), which revealed only two papers. One study found  
260 that MDD patients (N=104) were estimated to be +4.0 years older using brain-based age prediction  
261 models. A second study reported a non-significant relationship between brain-PAD and a short self-report  
262 scale of depressive symptoms in male veterans (N=359) who served in the United States military. Thus,  
263 whether a diagnosis of MDD is associated with the multivariate metric of brain aging in a large dataset,  
264 and which clinical characteristics further impact this metric, remains elusive.

265

### 266 **Added value of this study**

267 To our knowledge, this is the first study to examine deviations of normative brain aging in MDD and  
268 associated clinical heterogeneity in a large international and multi-center dataset, by pooling data from  
269 >8,000 subjects from 29 research samples worldwide. The current study shows that chronological age  
270 can be predicted from gray matter features in a large heterogeneous dataset with an age range covering  
271 almost the entire lifespan (10-75 years). Moreover, we show that our brain age prediction model  
272 generalizes to unseen hold-out samples, as well as to completely independent samples from different  
273 scanning sites. We found that, at the group level, patients had, on average, a +0.90 years greater  
274 discrepancy between their predicted and actual age compared to control participants and there was a  
275 subtle relationship between self-reported symptom severity and advanced brain aging in the MDD group.  
276 Finally, the strongest effects were observed in patients with a late onset of depression (>55 years old;

277 +1.7 years), currently depressed (+1.2 years), and in their first episode (+1.2 years), compared to  
278 controls.

279

### 280 **Implications of all the available evidence**

281 This study confirms previously observed advanced biological aging in MDD at the group and brain level of  
282 analysis. However, it is important to mention the large within-group and small between-group variance,  
283 demonstrating that many patients did not show advanced brain aging. Our work contributes to the  
284 maturation of brain age models in terms of generalizability, deployability, and shareability, in pursuance of  
285 a canonical brain age algorithm. Further, other research groups with deep clinical phenotyping and  
286 longitudinal information on mental and somatic health outcomes may use our model to promote continued  
287 growth of knowledge for greater clinical application.

288

289

290

291

292

293

294

295

296

297

298

299

300

301

## 302 Introduction

303  
304 Major Depressive Disorder (MDD) is associated with an increased risk of cognitive decline,<sup>1</sup> brain  
305 atrophy,<sup>2</sup> aging-related diseases,<sup>2</sup> and importantly, overall mortality.<sup>3,4</sup> While normal aging is associated  
306 with significant loss of gray matter,<sup>5</sup> growing evidence suggests that neuropsychiatric disorders such as  
307 depression may have an accelerating effect on age-related brain atrophy.<sup>6</sup> Simultaneously, the aging  
308 population is increasing, and both depression and aging have been linked to poor somatic health and  
309 quality of life, and increased costs for society and healthcare.<sup>7,8</sup> This underscores the importance of  
310 identifying brain aging patterns in MDD patients to determine whether and how they deviate from healthy  
311 patterns of aging.

312  
313 Emerging evidence indicates that chronological age and biological age may be distinct processes that  
314 can diverge. Current multivariate pattern methods can predict chronological age from biological data (i.e.,  
315 epigenetics, transcriptomics, proteomics, metabolomics, see Jylhava, Pedersen, and Hagg for a review)<sup>9</sup>  
316 with high accuracy. Similarly, chronological age can be predicted from brain images, resulting in an  
317 estimate known as “brain age”.<sup>10</sup> Importantly, by calculating the difference between a person’s estimated  
318 brain age and their chronological age, one can translate a complex aging pattern across the brain into a  
319 single outcome:<sup>11</sup> brain-predicted age difference (brain-PAD).<sup>12</sup> A positive brain-PAD represents having  
320 an ‘older’ brain than expected for a person of their chronological age, whereas a negative brain-PAD  
321 signals a ‘younger’ brain than expected at the given chronological age. Higher brain-PAD scores have  
322 been associated with greater cognitive impairment,<sup>13</sup> increased morbidity,<sup>10</sup> and exposure to cumulative  
323 negative fateful life events (e.g., death of a close family member, financial hardship, or divorce).<sup>14</sup>

324  
325 Prior studies from the Enhancing NeuroImaging Genetics through Meta-analysis (ENIGMA)-MDD  
326 consortium with sample sizes over 9,000 participants have shown subtle reductions in subcortical  
327 structure volumes in major depression that were robustly detected across many samples worldwide.  
328 Specifically, smaller hippocampal volumes were found in individuals with earlier age of onset and  
329 recurrent episode status.<sup>15</sup> In addition, different patterns of cortical alterations were found in adolescents



330 versus adults with MDD, suggesting that MDD may affect brain morphology (or vice versa) in a way that  
331 depends on the developmental stage of the individual.<sup>16</sup> Likewise, brain development and aging likely  
332 differ by sex.<sup>17</sup> The different neural and clinical presentations of depression and aging across sex  
333 emphasize the need to stratify populations studied into groups of females and males to better understand  
334 sex-dependent or sex-specific effects.

335  
336 Given that prior studies suggest advanced biological aging in MDD (e.g., shorter telomere length,<sup>18</sup>  
337 greater epigenetic aging,<sup>19,20</sup> and advanced brain aging),<sup>6</sup> it is important to examine whether biological  
338 aging findings in depression can be confirmed in a large heterogeneous dataset consisting of many  
339 independent samples worldwide, based on commonly derived gray matter measures. Only a handful of  
340 studies have investigated brain-PAD in people with psychiatric disorders,<sup>21</sup> showing older brain-PAD in  
341 schizophrenia,<sup>6,22,23</sup> borderline personality disorder, and first-episode and at-risk mental state for  
342 psychosis,<sup>6,24</sup> yet findings were less consistent in bipolar disorder.<sup>23,25</sup>

343  
344 Only two studies to date specifically investigated premature brain aging in MDD - using relatively small  
345 samples of 104 and 211 patients, respectively, with inconsistent findings of a brain-PAD of +4.0 years  
346 versus no significant difference.<sup>6,26</sup> The current study is the first to examine brain aging in over 8,000  
347 individuals from the ENIGMA MDD consortium (29 cohorts, 11 countries worldwide), covering almost the  
348 entire lifespan (10-75 years). We hypothesized higher brain-PAD in MDD patients compared to controls.  
349 We also conducted exploratory analyses to investigate whether higher brain-PAD in MDD patients was  
350 associated with demographic (age, sex) and clinical characteristics such as disease recurrence,  
351 antidepressant use, remission status, depression severity, and age of onset of depression.

352

## 353 **Methods**

354

### 355 **Samples**

356 Twenty-nine cohorts from the ENIGMA-MDD working group with neuroimaging and clinical data from  
357 MDD patients and controls participated in this study (**appendix**). The combined sample covered almost

358 the entire lifespan (10-75 years of age). Details regarding demographics, clinical characteristics, and  
359 exclusion criteria for each cohort may be found in the **appendix**. Because the literature suggests  
360 differential brain development and maturation by sex,<sup>17</sup> we estimated brain age models separately for  
361 male and female samples. Sites with less than ten healthy males or females were excluded from the  
362 training dataset and subsequent analyses (for exclusions see **appendix**). In total, we included data from  
363 N=8,159 (93.5%) participants, including N=4,948 (56.7%) control individuals (N=2,236 [45.2%] males;  
364 N=2,712 [54.8%] females) and N=3,211 (36.8%) individuals with MDD (N=1,167 [36.3%] males; N=2,044  
365 [63.7%] females). All participating sites obtained approval from the appropriate local institutional review  
366 boards and ethics committees, and all study participants or their parents/guardians provided written  
367 informed consent.

368

### 369 **Training and test samples**

370 An overview of the data partition is shown in **figure 1A** and described in more detail in the **appendix**.  
371 Structural brain measures from 1,147 male obtained from 28 scanners and 1,386 female controls  
372 obtained from 34 scanners were included in the training sample. The top panel in **figure 1B** shows the  
373 chronological age distribution in the training sample. A hold-out dataset comprised of controls served as  
374 test sample to validate the accuracy of brain age prediction model; 1,089 male and 1,326 female controls  
375 from the same scanning sites were included. Likewise, 1,167 male and 2,044 female MDD patients from  
376 the corresponding neuroimaging sites were included in the MDD test sample. The bottom panel in **figure**  
377 **1B** shows the chronological age distributions across the test samples. More details on data partitioning  
378 are shown in the **appendix**.

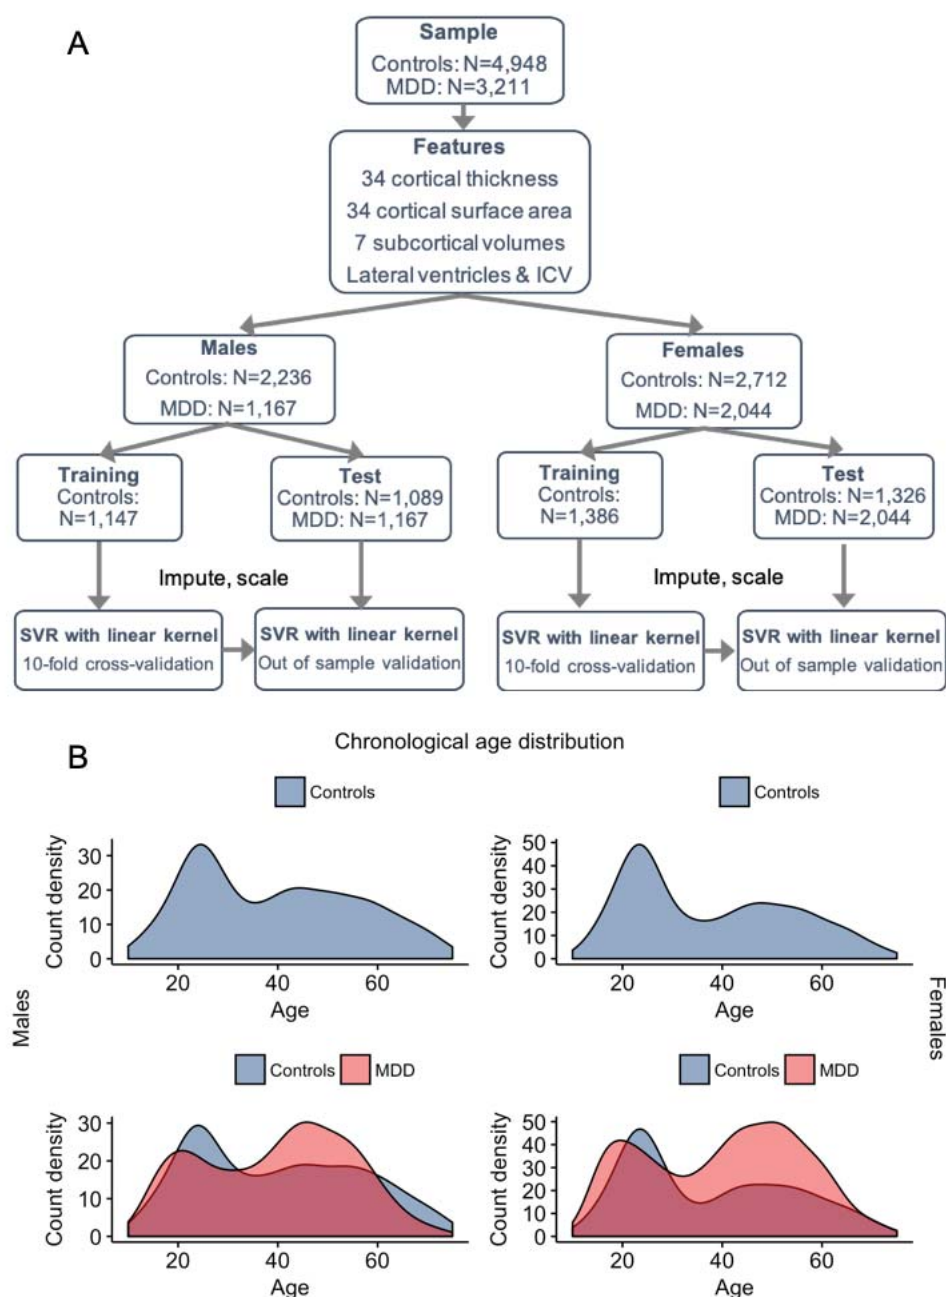

379

380

381

382

383

384

385

386

387

388

**Figure 1: (A) Schematic illustration of features used and data partition into training and test samples, separately for males and females. (B) Data from control groups (blue) were partitioned within scanning sites preserving chronological age distribution. Major depressive disorder (MDD) groups are shown in red. The top panel illustrates the male and female training samples. The bottom panels show the male (controls: mean [SD] in years, 40.0 [16.5]; MDD: 39.6 [14.8]) and female test samples (controls: 37.6 [16.2]; MDD: 40.0 [15.5]). ICV, intracranial volume; SVR, support vector regression.**

## 389 **Image processing and analysis**

390 Structural T1-weighted scans of each subject were acquired at each site and analyzed locally using  
391 standardized protocols to facilitate harmonized image analysis across multiple sites  
392 (<http://enigma.ini.usc.edu/protocols/imaging-protocols/>). Briefly, the fully automated and validated  
393 segmentation software, FreeSurfer 5.1 or 5.3 was used to segment seven subcortical gray matter regions  
394 (nucleus accumbens, amygdala, caudate, hippocampus, pallidum, putamen, and thalamus), lateral  
395 ventricles, 34 cortical thickness and 34 surface area measures, and total intracranial volume (ICV).  
396 Segmentations were visually inspected and statistically examined for outliers. Further details on cohort  
397 type, image acquisition parameters, software descriptions, and quality control may be found in the  
398 **appendix**. Individual-level structural brain measures and clinical and demographic measures from each  
399 cohort were pooled at a central site to perform the mega-analysis.

400

## 401 **Brain age prediction model**

402 To estimate the normative brain age models, we combined the FreeSurfer measures from the left and  
403 right hemispheres by calculating the mean  $((\text{left}+\text{right})/2)$  of volumes for subcortical regions and lateral  
404 ventricles, and thickness and surface area for cortical regions. Using a mega-analytic approach, we first  
405 estimated normative models of the association between the 77 average structural brain measures and  
406 chronological age in the training sample of controls (separately for males and females) using a support  
407 vector regression (SVR) with a linear kernel, from the python-based *sklearn* package.<sup>27</sup> All measures  
408 were combined as predictors in a single multivariate model.

409

410 To assess model performance and optimize the regularization parameter,  $C$ , we performed 10-fold cross-  
411 validation. To quantify model performance, we calculated the mean absolute error (MAE) between  
412 predicted brain age and chronological age. Both male and female brain age models will be made public  
413 upon publication (<https://www.photon-ai.com/>); for guidelines and instructions, see **appendix**. Of note, we  
414 also estimated a model including left and right hemisphere measures, that did not result in significantly  
415 superior prediction accuracy, which allowed us to reduce the feature space to average left/right values as  
416 described (data not shown). We also compared the SVR to other machine learning methods, including

417 ridge regression, Gaussian process regression, and generalized additive models. Results of these  
418 comparisons are provided in the **appendix**; briefly, the different approaches all showed similar  
419 performance to the model presented here.

420

#### 421 **Model validation**

422 Model performance was further validated in the test sample of controls. The parameters learned from the  
423 trained model in controls were applied to the test sample of controls and to the MDD test samples to  
424 obtain brain-based age estimates for these individuals. To assess model performance in these test  
425 samples, we calculated: a) MAE; b) Pearson correlation coefficients between predicted brain age and  
426 chronological age; and c) the proportion of the variance explained by the model ( $R^2$ ). To evaluate  
427 generalization power to completely independent test samples, we also applied the training model  
428 parameters to healthy control subjects (males, N=646; females, N=757) from the ENIGMA Bipolar  
429 Disorder (BD) working group (**appendix**).

430

#### 431 **Statistical analyses**

432 All statistical analyses were conducted in the test samples only. Brain-PAD (predicted brain-based age -  
433 chronological age) was calculated for each individual and used as the outcome variable. While different  
434 prediction models were built for males and females separately, the generated brain-PAD estimates were  
435 pooled for statistical analyses. For our main analysis, we investigated three linear mixed models (LMM) of  
436 brain-PAD: a) main effects of age, sex, and diagnosis, b) all main effects and all second order interactions  
437 of age, sex, and diagnosis, and c) main effects and all second and third order interactions of age, sex,  
438 and diagnosis. To calculate the association between each FreeSurfer feature and brain-PAD, we used  
439 univariate regressions corrected for multiple comparisons (false discovery rate; FDR). Surface area and  
440 subcortical measures were additionally corrected for ICV.

441

442 Within MDD patients, we also used LMM to examine associations of brain-PAD with clinical  
443 characteristics, including recurrence status (first vs. recurrent episode), antidepressant use at time of  
444 scanning (yes/no), remission status (currently depressed vs. remitted), depression severity at study

445 inclusion (the 17-item Hamilton Depression Rating Scale (HDRS-17) and the Beck Depression Inventory  
446 (BDI-II)), and age of onset of depression (categorized as: early, <26 years; adult, >25 & <56 years; and  
447 late onset, >55 years). All analyses included scanning site as a random intercept to account for scanner  
448 and FreeSurfer version differences and were corrected for chronological age, age<sup>2</sup>, age<sup>3</sup>, and sex, tested  
449 two-sided. Findings were considered statistically significant at  $p < 0.05$ .

450

#### 451 **Role of the funding source**

452 The study design, data collection, analysis, interpretation, writing, and submission of this report were  
453 performed independently from any funding source. The corresponding author had full access to the  
454 complete dataset in the study. All authors had the final responsibility for the decision to submit for  
455 publication.

456

## 457 **Results**

458

### 459 **Brain age can be predicted from regional brain measures**

460 Within the training set of controls, under cross-validation the structural brain measures predicted  
461 chronological age with a MAE of 6.86 (SD 5.32) years in males and 6.91 (5.34) years in females.  
462 Correlations between chronological and predicted brain age were  $r=0.85$ ,  $p < 0.001$  in males, and  $r=0.84$ ,  
463  $p < 0.001$  in females, with  $R^2=0.72$  and  $R^2=0.71$ , respectively. When applying the model parameters to the  
464 test samples of controls, the MAE was 6.35 (4.92) and 6.63 (5.08) years for males and females,  
465 respectively. Similarly, within the MDD group, the MAE was 6.86 (5.58) and 7.22 (5.42) years for males  
466 and females, respectively. **Figure 2** shows the correlation between chronological age (y-axis) and  
467 predicted brain age (x-axis)<sup>28</sup> in the out-of-sample control (males  $r=0.87$ ,  $p < 0.001$ ;  $R^2=0.76$  and females  
468  $r=0.86$ ,  $p < 0.001$ ;  $R^2=0.74$ ), and MDD test samples (males  $r=0.81$ ,  $p < 0.001$ ;  $R^2=0.66$  and females  $r=0.82$ ,  
469  $p < 0.001$ ;  $R^2=0.68$ ). The model also showed relatively good generalization to completely independent  
470 healthy control samples of the ENIGMA Bipolar Disorder working group (MAE=7.24 [SD 5.82];  $r=0.76$ ,  
471  $p < 0.001$ ;  $R^2=0.57$  for males and MAE=7.45 [5.44];  $r=0.75$ ,  $p < 0.001$ ;  $R^2=0.56$ , for females), **appendix**.

472

473

474

475

476

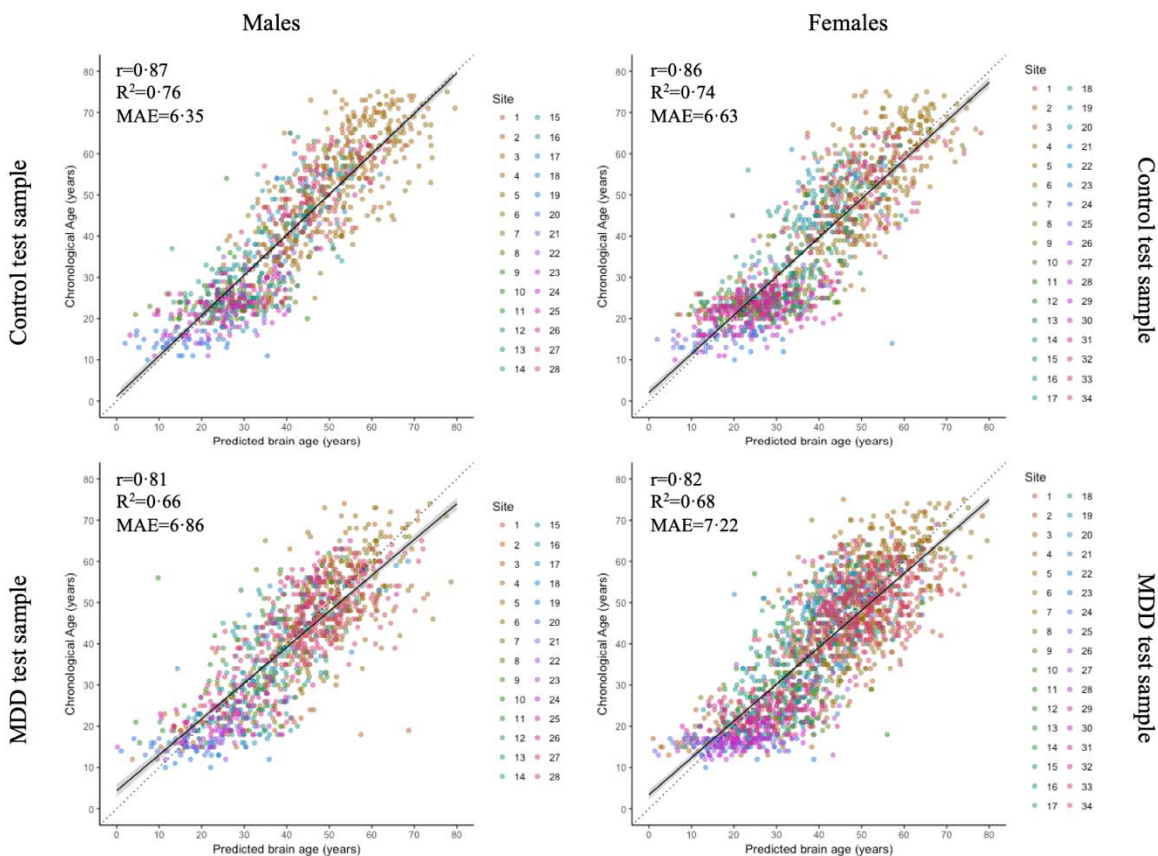

477

478

479 **Figure 2: Brain age prediction based on 7 FreeSurfer subcortical volumes, lateral ventricles, 34**

480 **cortical thickness and 34 surface area measures, and total intracranial volume.** The plots show the

481 correlation between chronological age and predicted brain age in the test samples, derived from the 10-

482 fold cross-validation of the Support Vector Regression model in the training samples, separately for males

483 (left) and females (right). The colors indicate scanning sites and each circle represents an individual

484 subject: the upper panels display controls and the lower panels MDD patients. Diagonal dashed line

485 reflects the line of identity ( $x=y$ ).

486

487

488

489

490

491 **MDD patients show increased brain-PAD compared to controls**

492 There was a main effect of diagnostic group. Specifically, individuals with MDD showed +0.90 (SE 0.21)  
493 years higher brain-PAD than controls ( $p < 0.0001$ , Cohen's  $d = 0.12$ , 95% CI 0.06-0.17), **figure 3**.  
494 Additionally, we found significant main effects for age,  $age^2$ , and  $age^3$  ( $b = -0.02$ - $0.72$ , all  $p$ 's  $< 0.0001$ ), and  
495 a trend for a main effect of sex, with higher brain-PAD in females ( $b = 0.39$ ,  $p = 0.0501$ ). Our analyses  
496 revealed no significant three-way interaction between diagnosis-by-age-by-sex, nor significant two-way  
497 interactions. Of note, there were no significant interactions with age,  $age^2$ , or  $age^3$  and MDD status; thus,  
498 the residual age effects in the brain-PAD estimates did not influence the case-control difference. Further,  
499 all nonlinear age effects were accounted for in analyses. All FreeSurfer features, except the entorhinal  
500 and temporal pole average thickness, showed a significant ( $P_{FDR} < 0.05$ ) association with brain-PAD. All  
501 features, except the mean lateral ventricles, yielded negative associations, and are visualized in **figure 4**.

502  
503  
504  
505

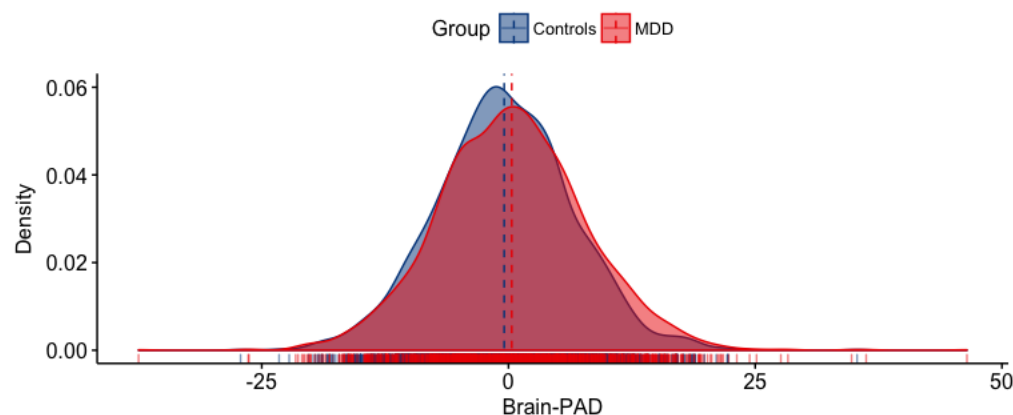

506  
507 **Figure 3: Case-control differences in brain aging.** Brain-PAD (predicted brain age - chronological age)  
508 in patients with major depressive disorder (MDD) and controls. Group level analyses showed that MDD  
509 patients exhibited significantly higher brain-PAD than controls ( $b = 0.90$ ,  $p < 0.0001$ ), although large within-  
510 group variation and between-group overlap is observed. The brain-PAD estimates are adjusted for  
511 chronological age,  $age^2$ ,  $age^3$ , sex and scanning site.

512  
513  
514  
515  
516  
517  
518



519  
520  
521  
522  
523

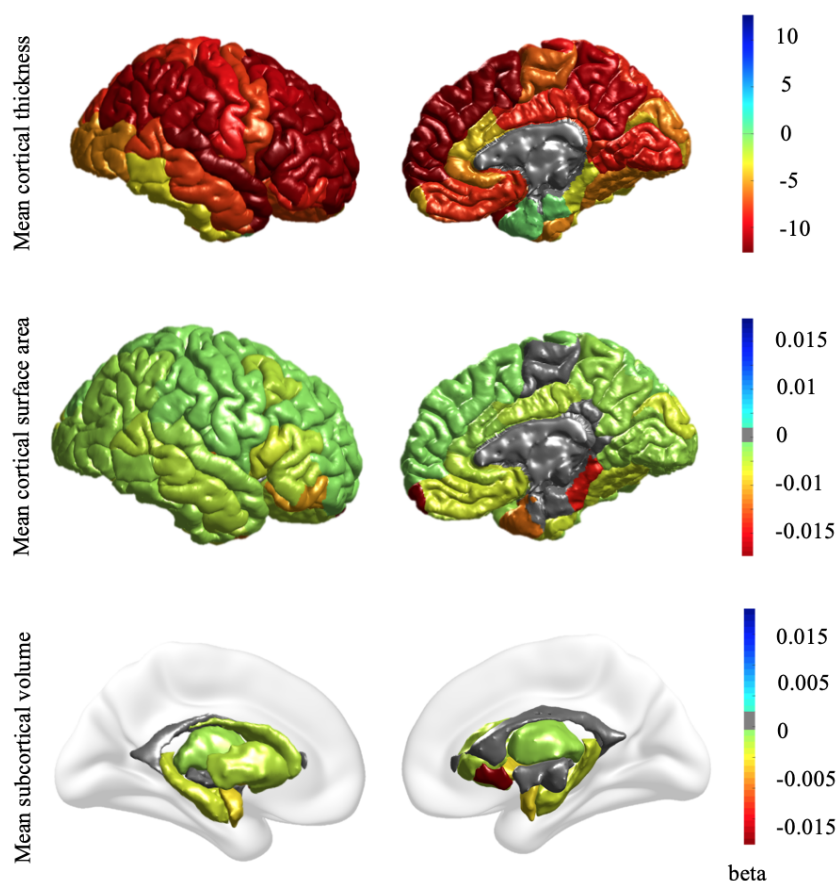

524  
525  
526  
527  
528  
529  
530  
531  
532  
533  
534  
535  
536  
537  
538  
539  
540  
541  
542  
543  
544  
545  
546

**Figure 4: Univariate associations between brain predicted age difference (predicted brain age - chronological age; brain-PAD) and FreeSurfer measures across controls and major depressive disorder (MDD) groups.** Effect sizes (regression coefficients) are shown for regions with a significant ( $P_{FDR} < 0.05$ ) negative association with brain-PAD, only the mean lateral ventricles yielded a significant positive association. The figure shows associations with cortical thickness measures (*top row*), cortical surface areas (*middle row*), and subcortical volumes (*bottom row*). The brain-PAD estimates are adjusted for chronological age,  $age^2$ ,  $age^3$ , sex and scanning site. The significant negative association with ICV was excluded from this figure for display purposes.

547  
548 **Clinical characteristics and brain-PAD**

549 Strongest effects of higher brain-PAD were observed in patients with late age of onset of depression (>55  
550 years; +1.7 years,  $p=0.009$ , Cohen's  $d=0.17$ ), currently depressed (+1.2y,  $p<0.0001$ ,  $d=0.13$ ), and first  
551 episode (+1.2y,  $p=0.0001$ ,  $d=0.12$ ) MDD patients, compared to controls. However, we observed relatively  
552 similar effects in remitted (+1.2y,  $p=0.01$ ,  $d=0.11$ ), both antidepressant users and antidepressant  
553 medication-free (both +0.9y,  $p's<0.002$ ,  $d=0.09$ ), early age of onset of depression (<26 years; +0.8y,  
554  $p=0.0005$ ,  $d=0.10$ ), and recurrent depressed patients (+0.7y,  $p=0.003$ ,  $d=0.08$ ), as well as in those with  
555 an adult age of onset of MDD (+0.5y,  $p=0.02$ ,  $d=0.06$ ), compared to controls (**table 1**). Post-hoc  
556 comparisons between the MDD subgroups did not show any significant differences (i.e., first vs. recurrent  
557 episode, antidepressant medication-free vs. antidepressant users, remitted vs. currently depressed  
558 patients, or early vs. adult vs. late age of onset of depression). Brain-PAD was positive in all MDD  
559 subgroups, and there were no negative associations with any clinical characteristics.

560  
561

| MDD patients vs. Controls | N     | b (p value)    | SE   | Cohen's d | SE   | 95% CI      |
|---------------------------|-------|----------------|------|-----------|------|-------------|
| First episode MDD         | 1,080 | 1.15 (0.0001)  | 0.28 | 0.12      | 0.04 | 0.05-0.19   |
| Recurrent episode MDD     | 1,940 | 0.73 (0.0027)  | 0.24 | 0.08      | 0.03 | 0.02-0.14   |
| Current MDD               | 2,179 | 1.23 (<0.0001) | 0.26 | 0.13      | 0.03 | 0.07-0.19   |
| Remitted MDD              | 344   | 1.24 (0.0146)  | 0.51 | 0.11      | 0.06 | -0.006-0.22 |
| AD medication-free        | 1,753 | 0.84 (0.0006)  | 0.25 | 0.09      | 0.03 | 0.03-0.15   |
| AD user                   | 1,366 | 0.85 (0.0020)  | 0.28 | 0.09      | 0.03 | 0.02-0.15   |
| All MDD patients          | 3,211 | 0.90 (<0.0001) | 0.21 | 0.12      | 0.03 | 0.06-0.17   |
| Early onset MDD           | 1,400 | 0.85 (0.0005)  | 0.24 | 0.10      | 0.03 | 0.03-0.16   |
| Adult onset MDD           | 1,420 | 0.54 (0.0244)  | 0.24 | 0.06      | 0.03 | -0.002-0.13 |
| Late onset MDD            | 125   | 1.73 (0.0091)  | 0.66 | 0.17      | 0.09 | -0.01-0.35  |

562 **Table 1: Clinical characteristics and brain aging.** Positive brain-PAD scores (predicted brain age -  
563 chronological age) were found for all subgroups of patients with major depressive disorder (MDD)  
564 compared to controls (N=2,256). b=regression coefficient; this indicates the average brain-PAD difference  
565 between MDD patients and controls in years. AD, Antidepressant.  
566

567  
568  
569

## 570 **Increased brain-PAD is associated with greater depressive symptom severity**

571 There was an association with depression severity at the time of scanning within the MDD sample,  
572 illustrated by higher brain-PAD in individuals with more severe self-reported depressive symptomatology  
573 ( $b=0.05$ ,  $p=0.004$ ) as measured in  $N=1,538$  patients who completed the BDI-II. We were not able to  
574 confirm this, however, in  $N=1,905$  depressed individuals who were assessed using the HDRS-17  
575 clinician-based questionnaire ( $b=0.003$ ,  $p=0.90$ ).

576

## 577 **Discussion**

578

579 Using a brain age algorithm based on commonly used brain measures derived from T1-weighted scans  
580 from over 3,500 males and 4,900 females, we found subtle age-associated gray matter differences in  
581 major depressive disorder (MDD). At the group level, the brain age model predicted chronological age in  
582 controls and MDD patients from 77 brain morphometric features, and patients had, on average, a 0.90  
583 years greater discrepancy between their predicted and actual age compared to control participants.  
584 Strongest effects were observed in late-life onset of depression ( $+1.7y$ ,  $d=0.17$ ), currently depressed  
585 ( $+1.2y$ ,  $d=0.13$ ), and first episode MDD ( $+1.2y$ ,  $d=0.12$ ) patients, compared to controls. Finally, each one-  
586 point increase in self-reported symptom severity score at study inclusion added, on average, 18 days of  
587 brain aging, potentially underscoring the importance of reducing the number of symptoms in the treatment  
588 of depression.

589

590 The positive association between brain aging and symptom severity, measured with the self-report BDI-II  
591 questionnaire, was not confirmed using the clinician-based HDRS-17. Post-hoc analyses in overlapping  
592 samples with both scores ( $N=1,302$ ) yielded a significant correlation between them ( $r=0.67$ ,  $p<0.0001$ ),  
593 yet the same discrepant association with brain-PAD. This could perhaps be explained by the differential  
594 proportion of items emphasizing cognitive and affective (BDI-II) or somatic and behavioral dimensions  
595 (HDRS-17).<sup>29</sup> Alternatively, brain age may be more sensitive to subjective (BDI) than to objectively  
596 (HDRS-17) rated experiences, consistent with the finding of Kwak and colleagues (2018) that the  
597 subjective experience of aging was closely related to predicted brain age.<sup>30</sup> However, it is important to

598 bear in mind the small effect size ( $b=0.05$ ). Nonetheless, positive associations with current depressive  
599 symptom severity have been previously reported with more advanced levels of biological aging, as  
600 indicated by shorter telomere length<sup>31</sup> and increased epigenetic aging.<sup>19</sup>

601  
602 This study showed relatively largest effect size of advanced brain aging in patients with a late-life onset of  
603 depression (>55 years old) compared to controls. However, we did not find significant differences  
604 between early vs. adult vs. late onset of depression groups. Additionally, no differences between remitted  
605 ( $N=344$ ) and acute patients ( $N=2,179$ ) were found, leading to the speculation that an initial brain insult  
606 during a first episode of depression or preceding clinical disease onset may leave a lasting impact even  
607 after remission. To date, the reversibility of gray matter alterations in MDD over time remains rather  
608 elusive due to the lack of reliable longitudinal studies.<sup>32</sup> Yet, cross-sectional studies show that “younger”  
609 appearing brains are seen in groups of individuals with greater physical activity,<sup>33</sup> long-term meditation  
610 practitioners,<sup>11</sup> and amateur musicians,<sup>34</sup> suggesting that brain age might be a modifiable metric.  
611 Moreover, one study suggests dynamic potential by showing that in healthy individuals brain-PAD was  
612 temporarily reduced by 1.1 years due to the probable acute anti-inflammatory effects of ibuprofen.<sup>35</sup> In  
613 this study, there was no detectable effect of antidepressant use on brain aging within MDD individuals. As  
614 antidepressants are suggested to exert a neuroprotective effect, for example by promoting brain-derived  
615 neurotrophic factor (BDNF),<sup>36</sup> it remains to be elucidated how adaptable brain age is in response to  
616 pharmacotherapy. However, the cross-sectional nature of the current study and the lack of detailed  
617 information on lifetime use, dosage and duration of use of antidepressants, do not allow us to draw any  
618 conclusions regarding direct effects of antidepressants on brain aging. Thus, longitudinal research and  
619 randomized controlled intervention studies are needed to develop an understanding of how reversible  
620 brain aging is after remission of MDD and how modifiable in response to pharmacology, but also to non-  
621 pharmacological strategies (e.g., psychological, exercise and/or nutritional interventions), as seen in other  
622 biological age indicators.<sup>37-39</sup>

623  
624 Further, the currently observed effect size of Cohen's  $d=0.12$  with regard to brain aging is consistent with  
625 previously seen modest structural brain differences in MDD. Earlier work from the ENIGMA MDD working

626 group also showed small subcortical (hippocampus;  $d=-0.14$ ), and small to moderate cortical reductions  
627 (e.g. left medial orbitofrontal cortex thickness in adults,  $d=-0.13$  and right lingual gyrus surface area in  
628 adolescents,  $d=-0.42$ ) in patients compared to controls.<sup>15,16</sup> Here, we particularly find strong widespread  
629 significant negative associations between brain aging and cortical thickness, and comparably weaker  
630 associations with surface area and subcortical volume measures (**figure 4**), consistent with literature on  
631 age-related structural brain changes in adolescents<sup>40</sup> and adults.<sup>41</sup> We also visualized these associations  
632 separately for controls and MDD patients, but findings were similar and suggest comparable spatial brain  
633 aging patterns in both groups (**appendix**). Notably, we did not include a spatial weight map of our brain  
634 age model, as the weights (although linear) are obtained from a multivariable model, and do not allow for  
635 a straightforward interpretation of the importance of the brain regions contributing to the aging pattern.

636  
637 Our findings were in contrast to earlier work showing a +4.0 years of brain aging in a smaller sample of  
638 MDD patients (N=104; 18-65 years).<sup>6</sup> However, a recent preliminary study in 211 MDD patients (18-71  
639 years) found a similar effect size to ours, albeit non-significant ( $d=0.10$ ,  $p=0.33$ ).<sup>26</sup> In the latter study,  
640 brain-PAD was derived using a brain age model trained on >12,000 healthy individuals (vs. the 800 in the  
641 Koutsouleris study<sup>6</sup> vs. >1,100 in this study), emphasizing the relevance of sample size for both training  
642 and test samples for sensitivity to detect reliable, yet subtle, effects. Similarly, with respect to reaching  
643 statistical significance, large sample sizes are needed to detect small effect sizes commonly found with  
644 biological age indicators,<sup>18,19,31</sup> but also other markers (e.g. BDNF, cortisol, oxidative stress)<sup>42-44</sup> in  
645 depression research. A major strength of this study is, therefore, the mega-analytic approach of pooling  
646 harmonized data from many heterogeneous sites, making predictive models less susceptible to  
647 overfitting<sup>45</sup> and more generalizable to other populations.<sup>46</sup>

648  
649 Inflammation may be a common biological mechanism between MDD and brain aging. Neuroimmune  
650 mechanisms (e.g. pro-inflammatory cytokines) influence biological processes (e.g. synaptic plasticity),  
651 and inflammatory biomarkers are commonly dysregulated in depression.<sup>47</sup> Both cerebrospinal fluid and  
652 peripheral blood interleukin (IL)-6 levels are elevated in MDD,<sup>48</sup> and increased IL-6 expression may affect  
653 brain morphology through neurodegenerative processes.<sup>49</sup> Moreover, work by Kakeda and colleagues

654 (2018) demonstrated a significant inverse relationship between IL-6 levels and surface-based cortical  
655 thickness and hippocampal subfields in medication-free, first-episode MDD patients.<sup>50</sup> This accords with  
656 the current observation of increased brain-PAD in medication-free and first-episode patients, compared to  
657 controls, perhaps suggesting that neuroimmune mechanisms may be chief candidates involved in the  
658 brain morphology alterations, also in the early stage of illness. Further, the age-related structural  
659 alterations in MDD may also be explained by shared underlying (epi)genetic mechanisms involved in  
660 brain development and plasticity (thereby influencing brain structure) and psychiatric illness.<sup>51</sup> For  
661 instance, Aberg and colleagues (2018) showed that a significant portion of the genes represented in  
662 overlapping blood-brain methylome-wide association findings for MDD were important for brain  
663 development, such as induction of synaptic plasticity by BDNF.<sup>52</sup>

664  
665 Our current findings in MDD show lower brain aging than previously observed in schizophrenia (SCZ)  
666 (brain-PAD ranges from +2.6 - +5.5y,  $d=0.64$ )<sup>6,22</sup>, even in early stages of first episode SCZ.<sup>25</sup> Inconsistent  
667 findings are reported in bipolar disorder (BD), with “younger” brain age<sup>23</sup> or no differences compared to  
668 controls.<sup>25</sup> However, more studies with larger sample sizes are needed to confirm brain aging in these  
669 psychiatric disorders - endeavors currently pursued by other ENIGMA psychiatric disease working groups  
670 using the same brain age models, which will allow future cross-disorder comparisons between brain-PAD  
671 in e.g. MDD, BD and SCZ.

672  
673 While our results are generally consistent with existing literature on advanced or premature biological  
674 aging and major depression using other biological indicators,<sup>18</sup> it is important to critically consider the  
675 current findings and note their limitations. First, limited information was available on clinical  
676 characterization and brain-PAD could not be compared against somatic health outcomes here. Second,  
677 given the relatively crude and limited number of gray matter features, the best MAE that could be  
678 achieved was 6.9 years, compared to ~4.9 years accomplished by other brain age predictors (e.g., those  
679 based on spatial images with high dimensional features that may also include white matter).<sup>12</sup> However,  
680 an advantage to using FreeSurfer data over voxelwise methods is that the fewer dimensions render our  
681 models less prone to overfitting and more flexible in exploring the use of different machines and kernels

682 **(appendix)**. Furthermore, pooling data from many scanning sites comes at the cost of increasing  
683 heterogeneity of MRI data and other sample specifics. However, withstanding the latter limitation, models  
684 are therefore consequently tested on “ecologically valid” samples, bolstering confidence in their  
685 deployability and shareability.<sup>53</sup> Finally, the large within-group variance regarding the brain-PAD outcome  
686 in both controls and MDD (**figure 3**), compared to the small between-group variance, renders the use of  
687 this brain aging indicator for discriminating patients and controls at the individual level difficult. As many of  
688 the MDD patients do not show advanced brain aging compared to controls, the clinical significance of the  
689 observed higher brain-PAD in MDD patients in this study may be limited. Yet, interindividual differences  
690 highlight the importance of studying the individual, rather than the average patient<sup>54</sup> and provide the  
691 opportunity to elucidate whether a subgroup of patients with high brain-PAD may be at risk for worse  
692 psychiatric, neurologic, and somatic health outcomes. Local sites that participated in this study with  
693 clinical phenotyping and longitudinal information on mental and somatic health outcomes (e.g., genomic  
694 variation, omics profiles, comorbidities, lifestyle, inflammation, oxidative stress, chronic diseases) will  
695 allow further evaluation of the predictive value of the brain-PAD estimates. This is expected to promote  
696 continued growth of knowledge in pursuance of useful clinical applications.

697  
698 In conclusion, compared to controls, both male and female MDD patients show advanced brain aging,  
699 with a subtle association with current symptom severity. This is consistent with other studies of biological  
700 aging indicators in MDD at cellular and molecular levels of analysis (i.e., telomere length and epigenetic  
701 age). The deviation of brain metrics from normative aging trajectories in MDD may contribute to increased  
702 risk for mortality and aging-related diseases commonly seen in MDD. However, the substantial within-  
703 group variance and overlap between groups signify that more (longitudinal) work including in-depth  
704 clinical characterization and more precise biological age predictor systems are needed to elucidate  
705 whether brain age indicators can be clinically useful in MDD. Future studies may use our current ENIGMA  
706 brain age prediction model to associate brain-PAD with treatment response and other available  
707 information on longitudinal mental and somatic health outcomes, other aging indicators, and incidence  
708 and/or prevalence of other chronic diseases in their local samples in pursuance of greater clinical  
709 application.

710

711

712

713

## 714 **Authors contributions**

715

716 *Concept and design:* AFM, BP, JHC, LKM, LS, LTE, NJ, PMT.

717

718 *Acquisition, analysis or interpretation of data:* AA, AC, AFM, AHS, AJ, AK, AMM, ANS, AS, AU, BAM,  
719 BCD, BG, BH, BJH, BJO, BK, BKD, BL, BP, BTB, CA, CC, CF, CGC, CGD, CH, CK, CM, CMB, CMD,  
720 DD, DG, DHW, DJS, DMC, EB, ECR, EF, EO,EPC, ES, EV, FLSD, FMH, FPM, GBF, GBH, GdZ, GM,  
721 GR, GT, GZ, HCW, HGR, HJG, HST, HV,HW, IB, IBH,IHG, IMV, JH, JHC,JL, JMF, JMG, JR, JR, JS, JS,  
722 JS, KB, KC, KLM, KS, KS, KW, LA, LKM, LN, LR, LS, LTE, LTS, MA, MA, MA, MCGO,MDS, MGSS,  
723 MH, MHS, MI, MJP, MJvT, MJW, ML, MMR, MP, MVZ, NG, NH, NRW, NW, OAA, OG, OS, PBM, PF,  
724 PGPR, PGS, PMT, PRS, RD, RK, RL, RM, RS, RV, SF, SF, SIT, SNH, SSM, SW, TCH, TDS, TE, TF,  
725 TH, TH, TK, TMC, TTY, UD, UFM, VE, VZ, XC.

726

727 *Drafting of the manuscript:* LKM, LS.

728

729 *Critical revision of the manuscript for important intellectual content:* AA, AC, AFM, AHS, AMM, AS, AU,  
730 BAM, BCD, BH, BJH, BK, BKD, BM, BP, BTB, CA, CC, CF, CGC, CGD, CK, CMB, DG, DJS, EB, EP, ES,  
731 EV, FLSD, FPM, GBF, GBH, GZ, HCW, HGR, HJG, HST, HV, HW, IHG, IMV, JHC, JMG, JR, JR, JS, JS,  
732 KB,KC, KLM, KS, KW, LA, LKM, LR, LS, LTE, LTS, MA, MA, MA, MDS, MH, MJP, MJW, ML, MMR,  
733 MW, NG, NH, NJ, NRW, NW, OAA, OG, PGS, PMT, RD, RK, RV, SEM, SF, SF, SW, TCH, TE, TF, TH,  
734 TH, TTY, UD, UFM, VE, XC.

735

736 *Statistical analysis:* AFM, JHC, LKM, LS, RD.

737

738 *Obtained funding:* AJ, AK, AMM, BH, BJH, BL, BP, CGD, CH, CMB, CMD, DMC, EB, EPC, EV, FMH,  
739 FPM, GBF, GZ, HJG, HV, IBH, IMV, JH, JMF, JS, KB, KLM, KS, KS, LR, LS, MA, MCGO, MGSS, MI,  
740 MJW, ML, MP, NG, NH, NJ, OAA, OG, PBM, PMT, PRS, RM, RS, TE, TF, TH, TK, UD, UFM, XC.

741

742 *Administrative, technical or material support:* AA, AHS, AS, AU, BCD, BH, BL, BM, BP, CA, CMB, CMD,  
743 DJS, DMC, ECR, EP, EPC, EV, FMH, GR, GZ, HGR, HJG, HST, HV, IMV, JMF, JMG, JR, JS, KLM, KS,  
744 LN, LR, LTS, MA, MCGO, MGSS, MJW, MMR, MW, NG, NH, NJ, OAA, PBM, PGS, PMT, PRS, RM, RS,  
745 SEM, SF, SSM, TH, XC.

746

747 *Supervision:* AFM, BP, JHC, LS.

748

749 All authors approved the content of the manuscript.

750

751

752

753

754

755



756

757

758

## 759 **Acknowledgments**

760 ENIGMA MDD: This work was supported by NIH grants U54 EB020403 and R01 MH116147.

761  
762 BiDirect-Münster: The study was supported by a grant from the German Federal Ministry of Education  
763 and Research (BMBF; grant FKZ-01ER0816 and FKZ-01ER1506).

764  
765 Calgary: This study was supported by the Alberta Children's Hospital Foundation.

766  
767 CliNG (Heidelberg): This work was partially supported by the Deutsche Forschungsgemeinschaft (DFG)  
768 via grants to OG (GR1950/5-1 and GR1950/10-1).

769  
770 CODE: The CODE cohort was collected from studies funded by Lundbeck and the German Research  
771 Foundation (WA 1539/4-1, SCHN 1205/3-1, SCHR443/11-1).

772  
773 DIP-Groningen: This study was supported by the Gratama Foundation, the Netherlands (2012/35 to NG)

774  
775 Dublin: The study was funded by Science Foundation Ireland, with a Stokes Professorship Grant to TF.

776  
777 Edinburgh: The research leading to these results was supported by IMAGEMEND, which received  
778 funding from the European Community's Seventh Framework Programme (FP7/2007-2013) under grant  
779 agreement no. 602450. This paper reflects only the author's views and the European Union is not liable  
780 for any use that may be made of the information contained therein. This work was also supported by a  
781 Wellcome Trust Strategic Award 104036/Z/14/Z.

782  
783 FOR2107-Marburg: This work was funded by the German Research Foundation (DFG, grant FOR2107  
784 KR 3822/7-2 to AK; FOR2107 KI 588/14-2 to TK and FOR2107 JA 1890/7-2 to AJ).

785  
786 Leiden: EPISCA was supported by GGZ Rivierduinen and the LUMC.

787  
788 Melbourne: This study was funded by National Health and Medical Research Council of Australia  
789 (NHMRC) Project Grants 1064643 (Principal Investigator BJH) and 1024570 (Principal Investigator CGD).

790  
791 Minnesota: This study was funded by the National Institute of Mental health grant K23MH090421 (D.  
792 Cullen) and Biotechnology Research Center grant P41RR008079 (Center for Magnetic Resonance  
793 Research), the National Alliance for Research on Schizophrenia and Depression, the University of  
794 Minnesota Graduate School, and the Minnesota Medical Foundation. This work was carried out in part  
795 using computing resources at the University of Minnesota Supercomputing Institute.

796  
797 Münster: This work was funded by the German Research Foundation (DFG, grant FOR2107 DA1151/5-1  
798 and DA1151/5-2 to UD; SFB-TRR58, Projects C09 and Z02 to UD) and the Interdisciplinary Center for  
799 Clinical Research (IZKF) of the medical faculty of Münster (grant Dan3/012/17 to UD).

800  
801 Novosibirsk: This work was supported by Russian Science Foundation (RSF grant 16-15-00128) to LA.

802  
803 SHIP: The Study of Health in Pomerania (SHIP) is part of the Community Medicine Research net (CMR)  
804 (<http://www.medizin.uni-greifswald.de/icm>) of the University Medicine Greifswald, which is supported by  
805 the German Federal State of Mecklenburg- West Pomerania. MRI scans in SHIP and SHIP-TREND have

806 been supported by a joint grant from Siemens Healthineers, Erlangen, Germany and the Federal State of  
807 Mecklenburg-West Pomerania. This study was further supported by the EU-JPND Funding for BRIDGET  
808 (FKZ:01ED1615).

809  
810 Stanford: This work was supported by NIH grant R37 MH101495.

811  
812 Sydney: This study was supported by the following National Health and Medical Research Council  
813 funding sources: Programme Grant (no. 566529), Centres of Clinical Research Excellence Grant (no.  
814 264611), Australia Fellowship (no. 511921) and Clinical Research Fellowship (no. 402864).  
815 The QTIM dataset was supported by the Australian National Health and Medical Research Council  
816 (Project Grants No. 496682 and 1009064) and US National Institute of Child Health and Human  
817 Development (RO1HD050735 ).

818  
819 Geraldo Busatto was supported by the funding agencies FAPESP and CNPq, Brazil.

820  
821 Christopher Ching was supported by NIH grants U54 EB020403, RF1 AG041915, RF1AG051710,  
822 P41EB015922, R01MH116147, and R56AG058854.

823  
824 James Cole was funded by a UKRI Innovation Fellowship.

825  
826 Baptiste Couvy-Duchesne was supported by a NHMRC CJ Martin Fellowship (APP1161356).

827  
828 Cynthia Fu was supported in part by MRC grant, NIHR BRC grant.

829  
830 Beata Godlewska was supported by the Medical Research Council.

831  
832 Tiffany Ho was supported by the National Institute of Health (K01MH117442).

833  
834 Neda Jahanshad was supported by NIH grants R01 MH117601, R01 AG059874, U54 EB020403, RF1  
835 AG041915, RF1AG051710, P41EB015922, R01MH116147, and R56AG058854.

836  
837 Andre Marquand was supported by the Dutch Organization of Scientific Research under a  
838 Vernieuwingsimpuls 'VIDI' Fellowship (grant number 016.156.415)

839  
840 Sarah Medland was supported by an Australian National Health and Medical Research Council Senior  
841 Research Fellowship (APP1103623).

842  
843 Maria Portella was funded by Ministerio de Ciencia e Innovación of Spanish Government (ISCIII) through  
844 a "Miguel Servet II" (CP16/00020).

845  
846 Philipp Sämann reports funding by the German Research Foundation (DFG, SA 1358/2-1) and the Max  
847 Planck Institute of Psychiatry, Munich.

848  
849 Lianne Schmaal was supported by a NHMRC Career Development Fellowship (1140764).

850  
851 Jair Soares was supported by the Pat Rutherford Chair in Psychiatry, UTHealth.

852  
853 Paul Thompson was supported in part by NIH grants U54 EB020403, RF1 AG041915, RF1AG051710,  
854 P41EB015922, R01MH116147, and R56AG058854.

855  
856 Sophia Thomopoulos was supported in part by NIH grants U54 EB020403, RF1 AG041915,  
857 RF1AG051710, P41EB015922, R01MH116147, and R56AG058854.

858  
859 Tony Yang was supported for this study by: NIMH R01MH085734, NCCIH R21AT009173, UCSF  
860 Research Evaluation and Allocation Committee (REAC) and J. Jacobson Fund, the Brain and Behavior  
861 Research Foundation (formerly NARSAD).

862  
863 Amsterdam DIADE: The DIADE study was funded by ZonMW OOG 2007, the Netherlands (#100002034).  
864  
865 Cardiff: The Cardiff dataset was supported through a 2010 NARSAD Young Investigator Award (ref:  
866 17319) to XC.  
867  
868 CIAM Cape Town: This work was supported by the University Research Council of the University of Cape  
869 Town and the National Research Foundation of South Africa.  
870  
871 FIDMAG Barcelona: This work was supported by the Generalitat de Catalunya (2014 SGR 1573) and  
872 Instituto de Salud Carlos III (CP116/00018) and (PI14/01151 and PI14/01148).  
873  
874 Galway: This work was supported by the Health Research Board, Ireland and the Irish Research Council.  
875  
876 Grenoble: This work was supported by research grants from Grenoble University Hospital.  
877  
878 Halifax: This work was supported by the Canadian Institutes of Health Research (142255).  
879  
880 MOODINFLAME Groningen: This study was funded by EU-FP7-HEALTH-222963 'MOODINFLAME' and  
881 EU-FP7-PEOPLE- 286334 'PSYCHAID'.  
882  
883 Oslo: Funded by the South-Eastern Norway Regional Health Authority (2014097) and a research grant  
884 from Mrs. Throne-Holst.  
885  
886 Paris: This work was supported by the FRM (Fondation pour la recherche Biomédicale) "Bio-informatique  
887 pour la biologie" 2014 grant.  
888  
889 Singapore: Funded by Singapore Bioimaging Consortium Research Grant (SBIC RP C-009/2006) and  
890 NHG grant (SIG/15012).  
891  
892 UNSW: Australian NHMRC Program Grant 1037196 and Project Grants 1063960 and 1066177; and the  
893 Janette Mary O'Neil Research Fellowship to JMF.  
894  
895 VA San Diego Healthcare/University of California San Diego: This study was supported by  
896 R01MH083968, Desert-Pacific Mental Illness Research Education and Clinical Center, and the US  
897 National Science Foundation (Science Gateways Community Institutes; XSEDE).  
898  
899 Ole Andreassen was funded by the Research Council of Norway (223273, 248778, 273291), NIH  
900 (ENIGMA grants).  
901  
902 Caterina Bonnin thanks the PERIS grant contract by Departament de Salut CERCA  
903 Programme/Generalitat de Catalunya SLT002/16/00331.  
904  
905 Jose Goikolea thanks the support of CIBERSAM and the Comissionat per a Universitats i Recerca del  
906 DIUE de la Generalitat de Catalunya to the Bipolar Disorders Group (2017 SGR 1365) and the project  
907 SLT006/17/00357, from PERIS 2016-2020 (Departament de Salut). CERCA Programme/Generalitat de  
908 Catalunya.  
909  
910 Tomas Hajek was supported by the Canadian Institutes of Health Research (103703, 106469), Nova  
911 Scotia Health Research Foundation, Dalhousie Clinical Research Scholarship, Brain & Behavior  
912 Research Foundation (formerly NARSAD) 2007 Young Investigator and 2015 Independent Investigator  
913 Awards.  
914  
915 Mikael Landén was funded by the Swedish state under the ALF-agreement (ALF 20170019, ALFGBG-  
916 716801) and the Swedish Research Council (2018-02653).  
917

918 Joaquim Radua thanks the Miguel Servet contract by the Spanish Ministerio de Ciencia, Innovacion y  
919 Universidades.

920  
921 Jonathan Savitz was supported by the National Institute of General Medical Sciences (P20GM121312)  
922 and the National Institute of Mental Health (R21MH113871)

923  
924 Mauricio Seroa was supported by the funding agencies CAPES, Brazil.

925  
926 Dan Stein was supported by the SAMRC.

927  
928 Garrett Timmons' work was supported by the National Institutes of Health, Grant T35 AG026757/AG/NIA  
929 and the University of California San Diego, Stein Institute for Research on Aging.

930  
931 Eduard Vieta thanks the support of the Spanish Ministry of Science, Innovation and Universities  
932 (PI15/00283) integrated into the Plan Nacional de I+D+I y cofinanciado por el ISCIII-Subdirección  
933 General de Evaluación y el Fondo Europeo de Desarrollo Regional (FEDER); CIBERSAM; and the  
934 Comissionat per a Universitats i Recerca del DIUE de la Generalitat de Catalunya to the Bipolar  
935 Disorders Group (2017 SGR 1365) and the project SLT006/17/00357, from PERIS 2016-2020  
936 (Departament de Salut). CERCA Programme/Generalitat de Catalunya.

937  
938 Marcus Zanetti was supported by FAPESP, Brazil (grant no. 2013/03905-4).

939  
940

## 941 **Conflicts of interest**

942 These authors all declare no conflicts of interest:

943 Lyubomir Aftanas, Moji Aghajani, André Aleman, Bernhard Baune, Klaus Berger, Ivan Brak, Geraldo  
944 Busatto Filho, Angela Carballedo, Christopher Ching, James Cole, Colm Connolly, Baptiste Couvy-  
945 Duchesne, Kathryn Cullen, Udo Dannlowski, Christopher Davey, Danai Dima, Richard Dinga, Fabio  
946 Duran, Verena Enneking, Lisa Eyler, Elena Filimonova, Stefan Frenzel, Thomas Frodl, Cynthia Fu, Beata  
947 Godlewska, Ian Gotlib, Nynke Groenewold, Dominik Grotegerd, Oliver Gruber, Tim Hahn, Geoffrey Hall,  
948 Laura Han, Ben Harrison, Sean Hatton, Marco Hermesdorf, Tiffany Ho, Norbert Hosten, Neda  
949 Jahanshad, Andreas Jansen, Claas Kähler, Tilo Kircher, Bonnie Klimes-Dougan, Bernd Krämer, Axel  
950 Krug, Jim Lagopoulos, Ramona Leenings, Frank MacMaster, Glenda MacQueen, Andre Marquand,  
951 Andrew McIntosh, Katie McMahon, Sarah Medland, Philip Mitchell, Bryon Mueller, Benson Mwangi,  
952 Evgeny Osipov, Maria Portella, Elena Pozzi, Liesbeth Reneman, Jonathan Repple, Pedro Rosa, Matthew  
953 Sacchet, Philipp Sämann, Lianne Schmaal, Anouk Schranter, Egle Simulionyte, Jens Sommer, Dan  
954 Stein, Olaf Steinsträter, Lachlan Strike, Sophia Thomopoulos, Marie-José van Tol, Ilya Veer, Robert  
955 Vermeiren, Henrik Walter, Nic van der Wee, Steven van der Werff, Heather Whalley, Nils Winter,  
956 Katharina Wittfeld, Margaret Wright, Mon-Ju Wu, Dick Veltman, Henry Völzke, Tony Yang, Vasileios  
957 Zannias, Greic de Zubicaray, Giovana Zunta-Soares, Christoph Abé, Martin Alda, Ole Andreassen,  
958 Erlend Bøen, Caterina Bonnin, Erick Canales-Rodriguez, Dara Cannon, Xavier Caseras, Tiffany Chaim-  
959 Avancini, Pauline Favre, Sonya Foley, Janice Fullerton, Jose Goikolea, Bartholomeus Haarman, Tomas  
960 Hajek, Chantal Henry, Josselin Houenou, Fleur Howells, Martin Ingvar, Rayus Kuplicki, Beny Lafer,  
961 Rodrigo Macha-Vieira, Ulrik Malt, Colm McDonald, Philip Mitchell, Leila Nabulsi, Maria Concepcion  
962 Garcia Otaduy, Bronwyn Overs, Mircea Polosan, Edith Pomarol-Clotet, Joaquim Radua, Maria Rive,  
963 Gloria Roberts, Henricus Ruhe, Raymond Salvador, Salvador Sarró, Theodore Satterthwaite, Jonathan  
964 Savitz, Aart Schene, Peter Schofield, Mauricio Serpa, Kang Sim, Marcio Gerhardt Soeiro-de-Souza,  
965 Ashley Sutherland, Henk Temmingh, Garrett Timmons, Anne Uhlmann, Daniel Wolf, Marcus Zanetti.

966  
967 These authors received the following funding, however, all unrelated to the current manuscript:

968 Beata Godlewska has received a (non-related) travel grant from Janssen UK.

969 Hans Grabe has received travel grants and speakers' honoraria from Fresenius Medical Care and  
970 Janssen Cilag. He has received research funding from the German Research Foundation (DFG), the  
971 German Ministry of Education and Research (BMBF), the DAMP Foundation, Fresenius Medical Care,  
972 the EU "Joint Programme Neurodegenerative Disorders (JPND) and the European Social Fund (ESF)".  
973

974 Ian Hickie was an inaugural Commissioner on Australia's National Mental Health Commission (2012-  
975 2018). He is the Co-Director, Health and Policy at the Brain and Mind Centre (BMC) University of Sydney.  
976 The BMC operates an early-intervention youth services at Camperdown under contract to headspace.  
977 Professor Hickie has previously led community-based and pharmaceutical industry-supported (Wyeth, Eli  
978 Lilly, Servier, Pfizer, AstraZeneca) projects focused on the identification and better management of  
979 anxiety and depression. He was a member of the Medical Advisory Panel for Medibank Private until  
980 October 2017, a Board Member of Psychosis Australia Trust and a member of Veterans Mental Health  
981 Clinical Reference group. He is the Chief Scientific Advisor to, and an equity shareholder in, Innowell.  
982 Innowell has been formed by the University of Sydney and PwC to deliver the \$30m Australian  
983 Government-funded 'Project Synergy'. Project Synergy is a three-year program for the transformation of  
984 mental health services through the use of innovative technologies.  
985

986 Brenda Penninx has received (non-related) research funding from Boehringer Ingelheim and Jansen  
987 Research  
988

989 Knut Schnell has consulted for Roche Pharmaceuticals and Servier Pharmaceuticals

990 Jair Soares has received research support from BMS, Forest, Merck, Elan, Johnson & Johnson and  
991 COMPASS in the form of grants and clinical trials. He is a member of the speakers' bureaus for Pfizer,  
992 Abbott and Sonify and he is a consultant for Astellas.  
993

994 Torbjørn Elvsåshagen has served as a speaker for Lundbeck.  
995

996 Mikael Landén declares that, over the past 36 months, he has received lecture honoraria from Lundbeck  
997 pharmaceutical. No other equity ownership, profit-sharing agreements, royalties, or patent.  
998

999 Paul Thompson has received (non-related) research funding from Biogen, Inc. (Boston).  
1000

1001 Eduard Vieta has received grants and served as consultant, advisor or CME speaker for the following  
1002 entities: AB-Biotics, Abbott, Allergan, Angelini, AstraZeneca, Bristol-Myers Squibb, Dainippon Sumitomo  
1003 Pharma, Farindustria, Ferrer, Forest Research Institute, Gedeon Richter, Glaxo-Smith-Kline, Janssen,  
1004 Lundbeck, Otsuka, Pfizer, Roche, SAGE, Sanofi-Aventis, Servier, Shire, Sunovion, and Takeda.  
1005  
1006

1007

1008

1009

1010

1011

1012

1013

1014

1015

1016

## 1017 **References**

- 1018 1 John A, Patel U, Rusted J, Richards M, Gaysina D. Affective problems and decline in cognitive state  
1019 in older adults: a systematic review and meta-analysis. *Psychol Med* 2018; : 1–13.
- 1020 2 Penninx BWJH. Depression and cardiovascular disease: Epidemiological evidence on their linking  
1021 mechanisms. *Neurosci Biobehav Rev* 2016. DOI:10.1016/j.neubiorev.2016.07.003.
- 1022 3 Walker ER, McGee RE, Druss BG. Mortality in mental disorders and global disease burden  
1023 implications: a systematic review and meta-analysis. *JAMA Psychiatry* 2015; **72**: 334–41.
- 1024 4 Katon WJ. Epidemiology and treatment of depression in patients with chronic medical illness.  
1025 *Dialogues Clin Neurosci* 2011; **13**: 7–23.
- 1026 5 Pfefferbaum A, Rohlfing T, Rosenbloom MJ, Chu W, Colrain IM, Sullivan EV. Variation in longitudinal  
1027 trajectories of regional brain volumes of healthy men and women (ages 10 to 85 years) measured  
1028 with atlas-based parcellation of MRI. *Neuroimage* 2013; **65**: 176–93.
- 1029 6 Koutsouleris N, Davatzikos C, Borgwardt S, *et al.* Accelerated brain aging in schizophrenia and  
1030 beyond: A neuroanatomical marker of psychiatric disorders. *Schizophr Bull* 2014; **40**: 1140–53.
- 1031 7 Kessler RC, Bromet EJ, de Jonge P, Shahly V, Wilcox M. The Burden of Depressive Illness. *Public  
1032 Health Perspectives on Depressive Disorders (2017)* 2017; **40**.  
1033 <https://books.google.nl/books?hl=en&lr=&id=MOEsDwAAQBAJ&oi=fnd&pg=PT56&dq=burden+major+r+depression&ots=ZuoTrz61Ow&sig=Lw5ghJk78h50BInYqJcDILsWnkA>.
- 1035 8 Diniz BS, Vieira EM. Stress, Inflammation, and Aging: An Association Beyond Chance. *Am J Geriatr  
1036 Psychiatry* 2018; **26**: 964–5.
- 1037 9 Jylhava J, Pedersen NL, Hagg S. Biological Age Predictors. *EBioMedicine* 2017; **21**: 29–36.
- 1038 10 Cole JH, Franke K. Predicting Age Using Neuroimaging: Innovative Brain Ageing Biomarkers.  
1039 *Trends Neurosci* 2017; **40**: 681–90.
- 1040 11 Luders E, Cherbuin N, Gaser C. Estimating brain age using high-resolution pattern recognition:  
1041 Younger brains in long-term meditation practitioners. *Neuroimage* 2016; **134**: 508–13.
- 1042 12 Cole JH, Ritchie SJ, Bastin ME, *et al.* Brain age predicts mortality. *Mol Psychiatry* 2017; : 1–8.
- 1043 13 Liem F, Varoquaux G, Kynast J, *et al.* Predicting brain-age from multimodal imaging data captures  
1044 cognitive impairment. *Neuroimage* 2017; **148**: 179–88.
- 1045 14 Hatton SN, Franz CE, Elman JA, *et al.* Negative fateful life events in midlife and advanced predicted  
1046 brain aging. *Neurobiol Aging* 2018; **67**: 1–9.
- 1047 15 Schmaal L, Veltman DJ, van Erp TGM, *et al.* Subcortical brain alterations in major depressive  
1048 disorder: findings from the ENIGMA Major Depressive Disorder working group. *Mol Psychiatry* 2015;  
1049 : 1–7.
- 1050 16 Schmaal L, Hibar DP, Sämann PG, *et al.* Cortical abnormalities in adults and adolescents with major  
1051 depression based on brain scans from 20 cohorts worldwide in the ENIGMA Major Depressive

- 1052 Disorder Working Group. *Mol Psychiatry* 2016; **22**: 900.
- 1053 17 Jahanshad N, Thompson PM. Mini-Review Multimodal Neuroimaging of Male and Female Brain  
1054 Structure in Health and Disease Across the Life Span. 2017; **379**: 371–9.
- 1055 18 Darrow SM, Verhoeven JE, Révész D, *et al.* The Association Between Psychiatric Disorders and  
1056 Telomere Length: A Meta-Analysis Involving 14,827 Persons. *Psychosom Med* 2016; **78**: 776–87.
- 1057 19 Han LKM, Aghajani M, Clark SL, *et al.* Epigenetic Aging in Major Depressive Disorder. *Am J*  
1058 *Psychiatry* 2018; : appi.ajp.2018.1.
- 1059 20 Whalley HC, Gibson J, Marioni R, *et al.* Accelerated epigenetic ageing in depression. 2017.
- 1060 21 Cole JH, Marioni RE, Harris SE, Deary IJ, Cole JH. Brain age and other bodily ‘ ages ’ : implications  
1061 for neuropsychiatry. *Mol Psychiatry* 2018. DOI:10.1038/s41380-018-0098-1.
- 1062 22 Schnack HG, Van Haren NEM, Nieuwenhuis M, Pol HEH, Cahn W, Kahn RS. Accelerated brain  
1063 aging in schizophrenia: A longitudinal pattern recognition study. *Am J Psychiatry* 2016; **173**: 607–16.
- 1064 23 Nenadic I, Dietzek M, Langbein K, Sauer H, Gaser C. BrainAGE score indicates accelerated brain  
1065 aging in schizophrenia, but not bipolar disorder. *Psychiatry Research: Neuroimaging* 2017.  
1066 DOI:10.1016/j.pscychresns.2017.05.006.
- 1067 24 Kolenic M, Franke K, Hlinka J, *et al.* Obesity, dyslipidemia and brain age in first-episode psychosis. *J*  
1068 *Psychiatr Res* 2018; **99**: 151–8.
- 1069 25 Hajek T, Franke K, Kolenic M, *et al.* Brain Age in Early Stages of Bipolar Disorders or Schizophrenia.  
1070 *Schizophr Bull* 2017; published online Dec 20. DOI:10.1093/schbul/sbx172.
- 1071 26 Kaufmann T, Meer DVD, Doan NT, *et al.* Genetics of brain age suggest an overlap with common  
1072 brain disorders. 2018.
- 1073 27 Pedregosa F, Varoquaux G, Gramfort A, *et al.* Scikit-learn: Machine Learning in Python. *J Mach*  
1074 *Learn Res* 2011; **12**: 2825–30.
- 1075 28 Piñeiro G, Perelman S, Guerschman JP, Paruelo JM. How to evaluate models: Observed vs.  
1076 predicted or predicted vs. observed? *Ecol Modell* 2008; **216**: 316–22.
- 1077 29 Brown C, Schulberg HC, Madonia MJ. Assessment depression in primary care practice with the  
1078 Beck Depression Inventory and the Hamilton Rating Scale for Depression. *Psychol Assess* 1995.  
1079 <http://psycnet.apa.org/fulltext/1995-27650-001.html>.
- 1080 30 Kwak S, Kim H, Chey J, Youm Y. Feeling How Old I Am: Subjective Age Is Associated With  
1081 Estimated Brain Age. *Front Aging Neurosci* 2018; **10**: 168.
- 1082 31 Verhoeven JE, Révész D, Epel ES, Lin J, Wolkowitz OM, Penninx BWJH. Major depressive disorder  
1083 and accelerated cellular aging: results from a large psychiatric cohort study. *Mol Psychiatry* 2013; :  
1084 1–7.
- 1085 32 Dohm K, Redlich R, Zwieterlood P, Dannlowski U. Trajectories of major depression disorders: A  
1086 systematic review of longitudinal neuroimaging findings. *Aust N Z J Psychiatry* 2017; **51**: 441–54.
- 1087 33 Steffener J, Habeck C, O’Shea D, Razlighi Q, Bherer L, Stern Y. Differences between chronological  
1088 and brain age are related to education and self-reported physical activity. *Neurobiol Aging* 2016; **40**:  
1089 138–44.
- 1090 34 Rogenmoser L, Kernbach J, Schlaug G, Gaser C. Keeping brains young with making music. *Brain*

- 1091 *Struct Funct* 2018; **223**: 297–305.
- 1092 35 Le TT, Kuplicki R, Yeh HW, *et al.* Effect of Ibuprofen on BrainAGE: A Randomized, Placebo-  
1093 Controlled, Dose-Response Exploratory Study. *Biological Psychiatry: Cognitive Neuroscience and*  
1094 *Neuroimaging* 2018; : 1–8.
- 1095 36 Castrén E, Kojima M. Brain-derived neurotrophic factor in mood disorders and antidepressant  
1096 treatments. *Neurobiol Dis* 2017; **97**: 119–26.
- 1097 37 Puterman E, Weiss J, Lin J, *et al.* Aerobic exercise lengthens telomeres and reduces stress in family  
1098 caregivers: A randomized controlled trial - Curt Richter Award Paper 2018.  
1099 *Psychoneuroendocrinology* 2018; **98**: 245–52.
- 1100 38 Chen L, Dong Y, Bhagatwala J, Raed A, Huang Y, Zhu H. Effects of Vitamin D3 supplementation on  
1101 epigenetic aging in overweight and obese African Americans with suboptimal vitamin D status: a  
1102 randomized clinical trial. *J Gerontol A Biol Sci Med Sci* 2018; published online Sept 25.  
1103 DOI:10.1093/gerona/gly223.
- 1104 39 Conklin QA, Crosswell AD, Saron CD, Epel ES. Meditation, Stress Processes, and Telomere  
1105 Biology. *Current Opinion in Psychology* 2018; published online Nov 19.  
1106 DOI:10.1016/j.copsyc.2018.11.009.
- 1107 40 Tamnes CK, Herting MM, Goddings AL. Development of the cerebral cortex across adolescence: A  
1108 multisample study of interrelated longitudinal changes in cortical volume, surface area and thickness.  
1109 *Journal of* 2017. [http://www.jneurosci.org/content/early/2017/02/27/JNEUROSCI.3302-](http://www.jneurosci.org/content/early/2017/02/27/JNEUROSCI.3302-16.2017.abstract)  
1110 [16.2017.abstract](http://www.jneurosci.org/content/early/2017/02/27/JNEUROSCI.3302-16.2017.abstract).
- 1111 41 Storsve AB, Fjell AM, Tamnes CK, *et al.* Differential longitudinal changes in cortical thickness,  
1112 surface area and volume across the adult life span: regions of accelerating and decelerating change.  
1113 *J Neurosci* 2014; **34**: 8488–98.
- 1114 42 Black CN, Bot M, Scheffer PG, Cuijpers P, Penninx BWJH. Is depression associated with increased  
1115 oxidative stress? A systematic review and meta-analysis. *Psychoneuroendocrinology* 2015; **51**: 164–  
1116 75.
- 1117 43 Vreeburg S a., Hoogendijk WJG, van Pelt J, *et al.* Major Depressive Disorder and Hypothalamic-  
1118 Pituitary-Adrenal Axis Activity. *Arch Gen Psychiatry* 2009; **66**: 617–26.
- 1119 44 Molendijk ML, Bus BAA, Spinhoven P, *et al.* Serum levels of brain-derived neurotrophic factor in  
1120 major depressive disorder: state–trait issues, clinical features and pharmacological treatment. *Mol*  
1121 *Psychiatry* 2011; **16**: 1088–95.
- 1122 45 Yarkoni T, Westfall J. Choosing Prediction Over Explanation in Psychology: Lessons From Machine  
1123 Learning. *Perspect Psychol Sci* 2017; **12**: 1100–22.
- 1124 46 Schnack HG, Kahn RS. Detecting neuroimaging biomarkers for psychiatric disorders: Sample size  
1125 matters. *Front Psychiatry* 2016; **7**. DOI:10.3389/fpsy.2016.00050.
- 1126 47 Wohleb ES, Franklin T, Iwata M, Duman RS. Integrating neuroimmune systems in the neurobiology  
1127 of depression. *Nat Rev Neurosci* 2016; **17**: 497–511.
- 1128 48 Wang AK, Miller BJ. Meta-analysis of Cerebrospinal Fluid Cytokine and Tryptophan Catabolite  
1129 Alterations in Psychiatric Patients: Comparisons Between Schizophrenia, Bipolar Disorder, and  
1130 Depression. *Schizophr Bull* 2018; **44**: 75–83.
- 1131 49 Frodl T, Carballedo A, Hughes MM, *et al.* Reduced expression of glucocorticoid-inducible genes  
1132 GILZ and SGK-1: high IL-6 levels are associated with reduced hippocampal volumes in major



- 1133 depressive disorder. *Transl Psychiatry* 2012; **2**: e88.
- 1134 50 Kakeda S, Watanabe K, Katsuki A, *et al.* Relationship between interleukin (IL)-6 and brain  
1135 morphology in drug-naïve, first-episode major depressive disorder using surface-based  
1136 morphometry. *Sci Rep* 2018; **8**: 10054.
- 1137 51 Elliott LT, Sharp K, Alfaro-Almagro F, *et al.* Genome-wide association studies of brain imaging  
1138 phenotypes in UK Biobank. *Nature* 2018; **562**: 210–6.
- 1139 52 Aberg KA, Dean B, Shabalin AA, *et al.* Methylome-wide association findings for major depressive  
1140 disorder overlap in blood and brain and replicate in independent brain samples. *Mol Psychiatry* 2018;  
1141 published online Sept 21. DOI:10.1038/s41380-018-0247-6.
- 1142 53 Woo C-W, Chang LJ, Lindquist MA, Wager TD. Building better biomarkers: brain models in  
1143 translational neuroimaging. *Nat Neurosci* 2017; **20**: 365–77.
- 1144 54 Wolfers T, Doan NT, Kaufmann T, *et al.* Mapping the Heterogeneous Phenotype of Schizophrenia  
1145 and Bipolar Disorder Using Normative Models. *JAMA Psychiatry* 2018; published online Oct 10.  
1146 DOI:10.1001/jamapsychiatry.2018.2467.
- 1147
